1                    **Modulation of sleep-courtship balance by nutritional status in *Drosophila***

2            José M. Duhart<sup>1</sup>, Victoria Baccini<sup>1</sup>, Yanan Zhang<sup>1</sup>, Daniel R. Machado<sup>1,2,3</sup>, and Kyunghee Koh<sup>1\*</sup>

3            <sup>1</sup>Department of Neuroscience, Farber Institute for Neurosciences, Thomas Jefferson University,  
4            Philadelphia PA

5            <sup>2</sup>Life and Health Sciences Research Institute (ICVS), School of Health Sciences, University of  
6            Minho, 4710-057 Braga, Portugal

7            <sup>3</sup>ICVS/3B's, PT Government Associate Laboratory, 4710-057 Braga/Guimarães, Portugal

8            \*For correspondence: [kyunghee.koh@jefferson.edu](mailto:kyunghee.koh@jefferson.edu)

## 9 **Abstract**

10 Sleep is essential but incompatible with other behaviors, and thus sleep drive competes with other  
11 motivations. We previously showed *Drosophila* males balance sleep and courtship via  
12 octopaminergic neurons that act upstream of courtship-regulating P1 neurons (Machado et al.,  
13 2017). Here we show nutrition modulates the sleep-courtship balance and identify sleep-regulatory  
14 neurons downstream of P1 neurons. Yeast-deprived males exhibited attenuated female-induced  
15 nighttime sleep loss yet normal daytime courtship, which suggests male flies consider nutritional  
16 status in deciding whether the potential benefit of pursuing female partners outweighs the cost of  
17 losing sleep. Trans-synaptic tracing and calcium imaging identified dopaminergic neurons  
18 projecting to the protocerebral bridge (DA-PB) as postsynaptic partners of P1 neurons. Activation  
19 of DA-PB neurons led to reduced sleep in normally fed but not yeast-deprived males. Additional  
20 PB-projecting neurons regulated male sleep, suggesting several groups of PB-projecting neurons  
21 act downstream of P1 neurons to mediate nutritional modulation of the sleep-courtship balance.

## 22 Introduction

23 Sleep is observed in every animal species studied in detail (Anafi et al., 2019), underscoring its  
24 importance for fitness. A widely accepted framework for understanding sleep regulation, called the  
25 two-process model, proposes that sleep is controlled by the circadian and homeostatic processes  
26 that convey information about the time of day and sleep drive, respectively (Borbély, 1982).  
27 However, since sleep prevents the execution of other critical behaviors such as feeding and  
28 mating, sleep is also influenced by motivational factors such as hunger and sex drive. For  
29 instance, sleep is suppressed by starvation in both rats and fruit flies, likely to allow the animal to  
30 forage for food (Jacobs and McGinty, 1971; Keene et al., 2010). Similarly, female sleep is reduced  
31 upon mating, presumably for egg laying purposes (Garbe et al., 2016; Isaac et al., 2010). Recently,  
32 we and others have shown that sleep is suppressed in favor of courtship when male flies are  
33 paired with females (Beckwith et al., 2017; Machado et al., 2017), demonstrating a competition  
34 between sleep and sex drive.

35 In addition to sleep and sex drive, both general and nutrient-specific hunger are important  
36 modulators of behavior. For instance, yeast deprivation in *Drosophila* alters food choice in favor of  
37 high protein food over the normal preference for high carbohydrate food. (Ribeiro and Dickson,  
38 2010). In addition, yeast provides essential nutrients for proper larval development (Anagnostou et  
39 al., 2010; Robertson, 1960), and the amount of yeast in the female diet correlates with the number  
40 of eggs laid (Lin et al., 2018). Although the effects of dietary yeast on male reproduction are  
41 relatively modest (Zajitschek et al., 2013; Fricke et al., 2008), we hypothesized that it may have a  
42 stronger influence on the choice between sleep and reproductive behavior in male flies.

43 Whereas a number of neuronal populations that regulate sleep or courtship have been  
44 identified (Artiushin and Sehgal, 2017; Ellendersen and von Philipsborn, 2017), only a few  
45 neuronal populations regulating both behaviors (i.e., sleep and courtship) are known. Among  
46 these, P1 neurons, which express the Fruitless<sup>M</sup> (Fru<sup>M</sup>) transcription factor and play a critical role in

47 courtship behavior (Clyne and Miesenböck, 2008; Kimura et al., 2008; Manoli et al., 2005;  
48 Stockinger et al., 2005), are also involved in male sleep regulation (Beckwith et al., 2017; Chen et  
49 al., 2017; Machado et al., 2017). P1 neurons are known to receive male-specific arousal signal  
50 from octopaminergic MS1 neurons (Machado et al., 2017) and act both upstream and downstream  
51 of DN1 clock neurons (Chen et al., 2017) to regulate the sleep-courtship balance. However, how  
52 P1 neurons communicate with downstream sleep circuits remains unknown.

53         Here we demonstrate that the sleep-courtship balance in male flies is affected by yeast  
54 deprivation in *Drosophila* and identify the protocerebral bridge (PB) as an arousal center acting  
55 downstream of P1 neurons. Yeast-deprived male flies exhibited attenuated female-induced  
56 nighttime sleep loss relative to normally fed males. In contrast, yeast deprivation did not impair the  
57 ability of males to court during the day, suggesting that dietary yeast affects the sleep-courtship  
58 balance rather than courtship per se. Using the trans-Tango trans-synaptic tracing technique  
59 (Talay et al., 2017), we identified a pair of dopaminergic neurons projecting to the protocerebral  
60 bridge (DA-PB) as neurons acting downstream of the P1 cluster. Calcium imaging confirmed a  
61 functional connection between the two groups of neurons. Furthermore, activation of DA-PB  
62 neurons led to sleep suppression in normally fed but not yeast-deprived males. Through a screen  
63 of PB-arborizing neurons, we identified additional neurons that regulate sleep specifically in males.  
64 We conclude that male sleep suppression by female cues is strongly affected by nutritional  
65 conditions and that P1, DA-PB, and additional PB-projecting neurons form a neural circuit for  
66 integrating sleep and sex drives in males.

67 **Results**

68

69 **Yeast deprivation modulates the balance between sleep and courtship**

70 We first examined whether nutritional status affects the balance between sleep and courtship in  
71 *Drosophila* males. Based on previous findings that seven days of sucrose-only diet alters the  
72 internal state of male flies (Ribeiro and Dickson, 2010), we assessed sleep in male-male (MM) or  
73 male-female (MF) pairs after seven days of sucrose-only diet. We fed groups of control (iso31) flies  
74 5% sucrose food or normal food (standard food for *Drosophila* maintenance, see Methods) for 6  
75 days, loaded the flies into tubes containing 5% sucrose in Male-Male (MM) or Male-Female (MF)  
76 pairs, and assessed sleep the next day using the single-beam *Drosophila* Activity Monitor (DAM)  
77 system (Figure 1A). As previously reported (Beckwith et al., 2017; Machado et al., 2017), under the  
78 normal food condition, MF pairs showed a marked reduction in sleep compared with MM pairs  
79 (Figure 1 B-D). Strikingly, yeast-deprived MF pairs showed increased nighttime sleep (i.e., reduced  
80 sleep suppression) compared with normally fed MF pairs (Figure 1B, D). In contrast, yeast  
81 deprivation resulted in a small decrease in sleep in MM pairs and individual males, and had little  
82 effect on sleep in individual females (Figure 1C, D, Figure1-figure supplement 1). These results  
83 demonstrate that the effects of yeast deprivation on sleep depend on the social context.

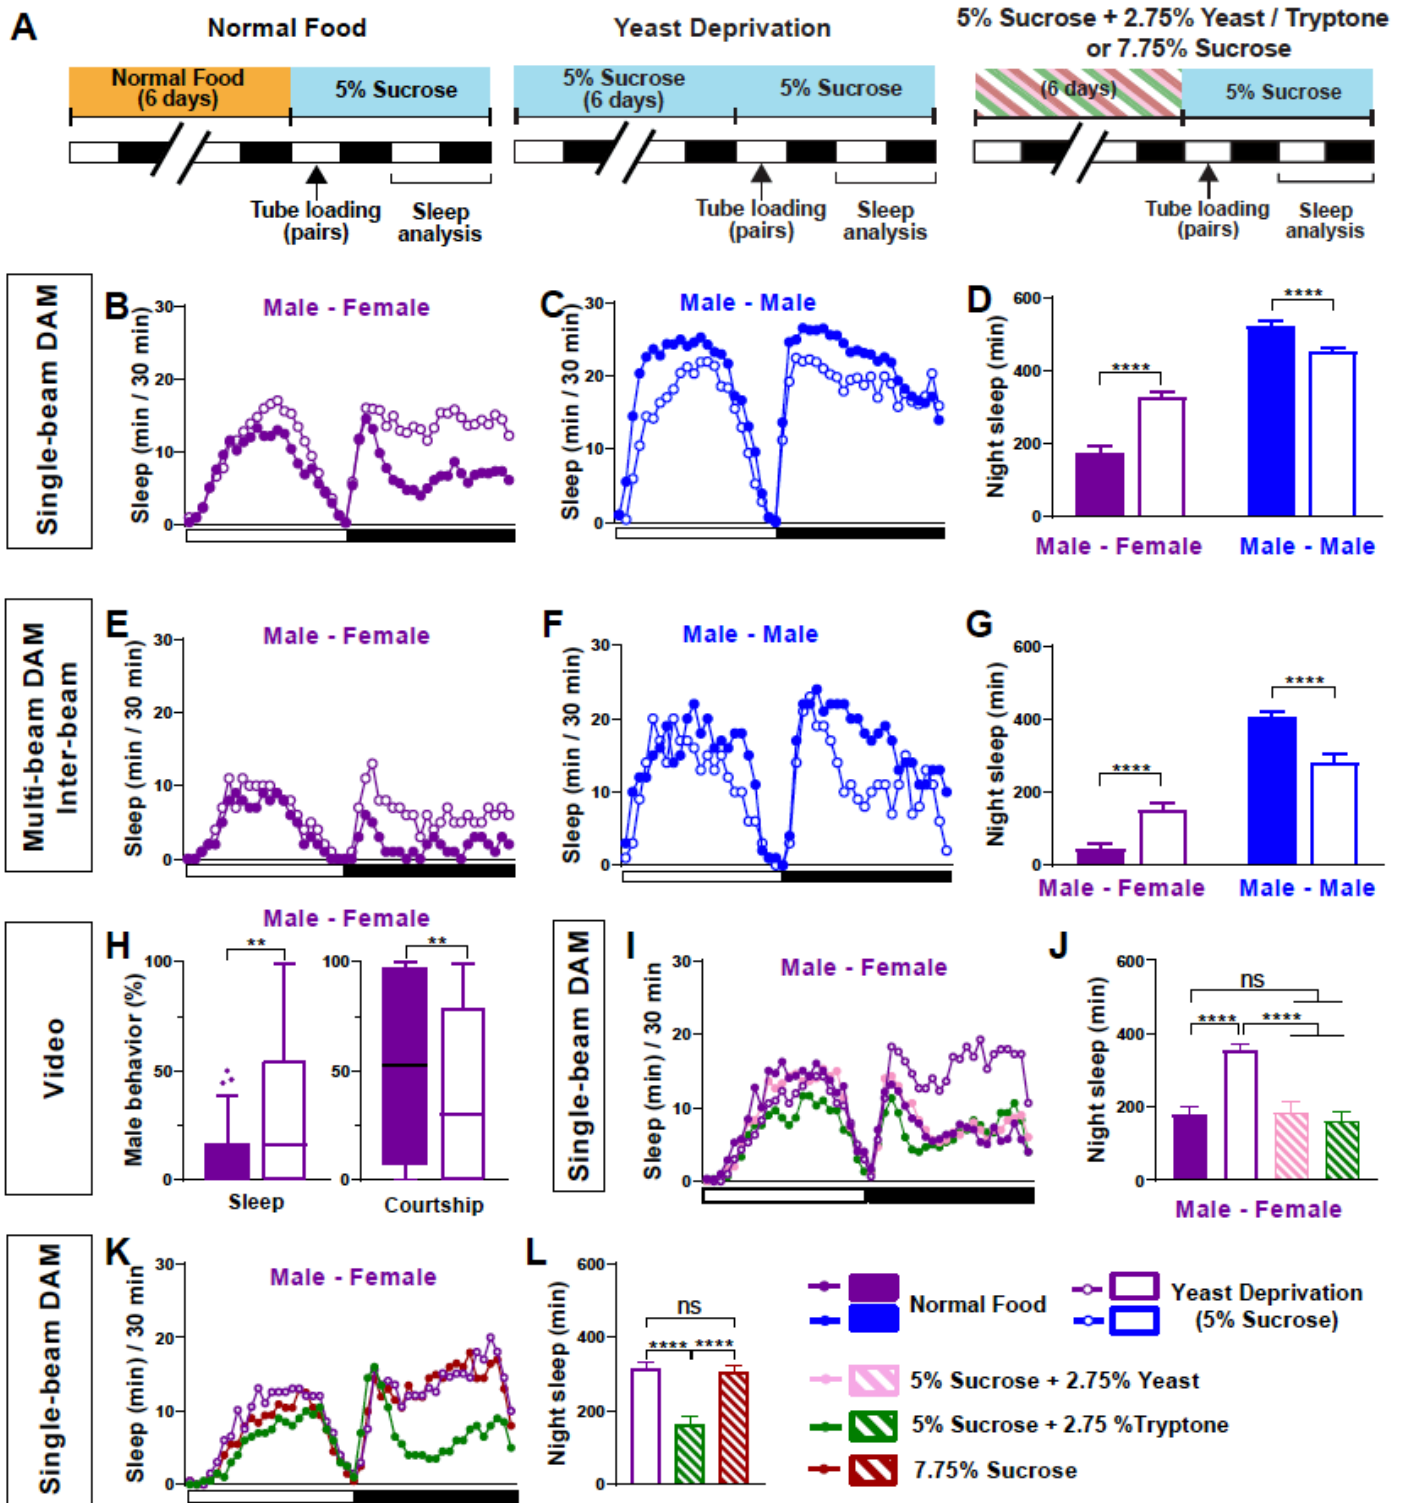

84

85 **Figure 1. Yeast deprivation modulates the balance between sleep and courtship.**

86 **(A)** Schematic diagram of the experimental design. After 6 days in varying nutritional conditions as  
 87 indicated, flies were loaded into tubes containing 5% sucrose in male-male (MM) or male-female  
 88 (MF) pairs. **(B-C)** Sleep profile in 30 min intervals for MF **(B)** or MM **(C)** pairs in the normal food or  
 89 yeast deprivation condition measured using single-beam monitors. N = 82 - 90. **(D)** Nighttime sleep  
 90 for flies shown in **(B)** and **(C)**. **(E-F)** Sleep profile in 30 min intervals for MF **(E)** or MM **(F)** pairs in

91 the normal food or yeast deprivation condition measured using multi-beam monitors. Sleep was  
92 computed based on inter-beam movements, i.e, movements between adjacent beams. N = 13 -  
93 32. **(G)** Nighttime sleep for flies shown in **(E)** and **(F)**. **(H)** Percent of time spent sleeping or courting  
94 for males in the normal food or yeast deprived condition. Both groups of males were paired with  
95 normally fed females. The first 5 min of every h between Zeitgeber time (ZT) 18-24 were manually  
96 scored from videos. Tuckey's method is used for boxplots; boxes extend from the 25th to 75th  
97 percentiles, and whiskers extend from the lowest to the highest value within  $\pm 1.5$  times the  
98 interquartile range. Data points above the whiskers are drawn as individual dots. N = 49 - 50. **(I)**  
99 Sleep profile of MF pairs in the normal food, 5% sucrose (yeast deprivation), 5% sucrose + 2.75%  
100 yeast, and 5% sucrose + 2.75% tryptone conditions. The Single-beam DAM system was used to  
101 measure sleep. N = 45 - 48. **(J)** Nighttime sleep for flies shown in **(I)**. **(K)** Sleep profile of MF pairs  
102 in 5% sucrose (yeast deprivation), 5% sucrose + 2.75% tryptone (tryptone supplemented), and  
103 7.75% sucrose conditions. The tryptone supplemented and 7.75% sucrose conditions are  
104 equivalent in caloric content. The single-beam DAM system was used to measure sleep. N = 60-  
105 64. **(L)** Nighttime sleep for flies shown in **(K)**. *Iso31* flies were used in all panels. In **(B-D)**, MM and  
106 MF pairs were composed of flies from the same nutritional condition. In **(E-L)** and subsequent  
107 figures, 4- to 5-day old normally fed males and females were used as partners for males from  
108 different nutritional conditions. In this and subsequent figures, bar graphs represent mean  $\pm$  SEM  
109 and the white and black bars in the experimental design and below the x-axis in sleep profile  
110 graphs indicate light and dark periods, respectively. \*\* $p < 0.01$ , \*\*\* $p < 0.001$ , \*\*\*\* $p < 0.0001$  and  
111 ns: not significant, two-way ANOVA,  $p < 0.0001$  for the interaction between sex and nutritional  
112 condition, followed by Sidak post hoc test **(D, G)**; Mann-Whitney test **(H)**; one-way ANOVA  
113 followed by Tukey post hoc test **(J, L)**.

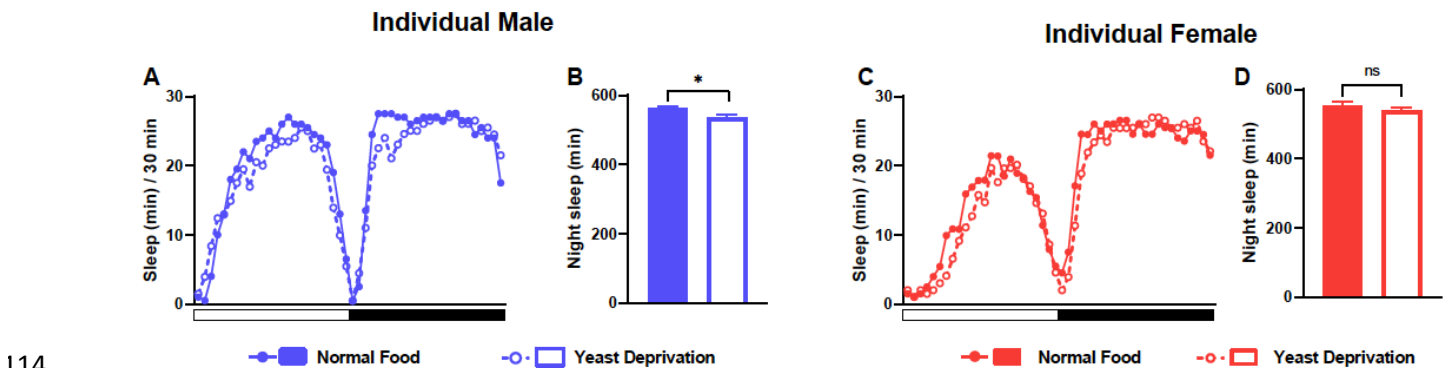

115 **Figure 1-figure supplement 1. Yeast deprivation does not promote sleep in individual flies.**

116 **(A)** Sleep profile in 30 min intervals for individual males from the normal food or yeast deprivation  
117 condition (see Figure 1A). N = 62. **(B)** Nighttime sleep for the flies shown in **(A)**. **(C)** Sleep profile in  
118 30 min intervals for individual females from the normal food or yeast deprivation condition. N = 61.  
119 **(D)** Nighttime sleep for the flies shown in **(C)**. \* $p < 0.05$ , ns: not significant, unpaired t test.

120

121 To rule out any contribution of the female nutritional status to the MF sleep, we paired yeast-  
122 deprived males with females that were kept in normal food until they were placed in tubes  
123 containing 5% sucrose food for sleep assay. Sleep in MF pairs with yeast-deprived males was  
124 independent of the nutritional status of the females in the pair (Figure 1-figure supplement 2),  
125 indicating that the effects of nutrition on MF sleep are due to its effects on male behavior. Since the  
126 present study is focused on the effects of male nutrition on male behavior, normally fed females  
127 were used in MF pairs in subsequent experiments.

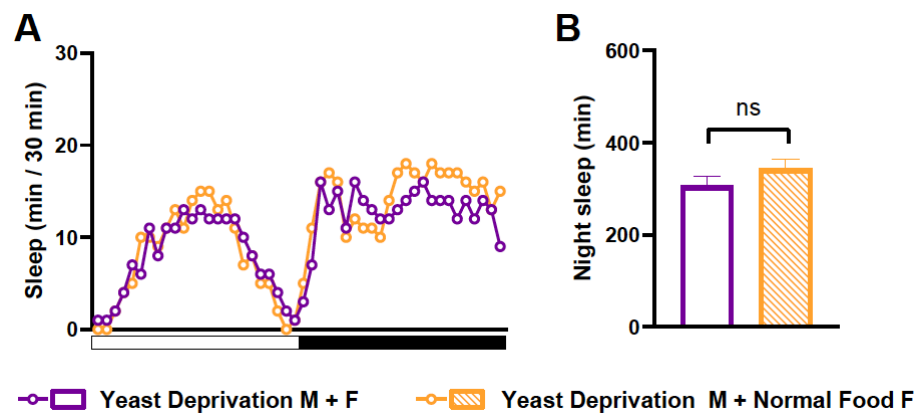

129 **Figure 1-figure supplement 2. Yeast deprivation effects on sleep in MF pairs are**  
130 **independent of the nutritional condition of the female.**

131 **(A)** Sleep profile in 30 min intervals for MF pairs in which yeast-deprived males were paired with  
132 either yeast-deprived females (Yeast Deprivation M + F) or normally fed females (Yeast  
133 Deprivation M + Normal Food F). N = 24- 25. **(B)** Nighttime sleep for the flies shown in **(A)**. ns: not  
134 significant, unpaired t test.

135

136 To control for the possibility that the single-beam DAM system with a single infrared detector  
137 missed small movements in yeast-deprived flies, we examined the effects of yeast deprivation  
138 using the multi-beam DAM system containing 17 infrared detectors. The multi-beam DAM system  
139 has two modes of analyzing movements: “moves,” which include only inter-beam movements (i.e.,  
140 movements between beams), and “counts,” which also include intra-beam movements (i.e., local  
141 movements within a single beam such as feeding and grooming). The latter analysis can  
142 underestimate sleep because of twitches that occur during sleep (Garbe et al., 2015). As



143 previously shown (Garbe et al., 2015), sleep measured with multi-beam monitors was lower than  
144 that measured with single-beam monitors, especially when both inter- and intra-beam movements  
145 (counts) were analyzed. Nevertheless, the effects of nutritional condition and social context on  
146 sleep were comparable between the two monitoring systems. As with single-beam data, multi-  
147 beam moves data showed that MF pairs with yeast-deprived males exhibited more nighttime sleep  
148 than normally fed MF pairs (Figure 1E, G), while yeast-deprived MM pairs slept less than normally  
149 fed MM pairs (Figure 1F, G). Even the highly sensitive counts analysis showed that MF pairs with  
150 yeast-deprived males slept significantly more than the normally fed counterparts during nighttime  
151 (Figure 1-figure supplement 3). Furthermore, video analysis of nighttime behavior confirmed that in  
152 MF pairs, yeast-deprived males slept significantly more than normally fed males (Figure 1H, Video  
153 1). There was a corresponding reduction in the time spent performing courtship by yeast-deprived  
154 males compared with males that were kept in normal food until the behavioral assay (Figure 1H,  
155 Video 1). These results show that the single-beam DAM system can reliably measure the effects of  
156 nutritional status on sleep. Since the single-beam DAM system has higher throughput than the  
157 multi-beam DAM system or video analysis, we used the single-beam DAM system for quantifying  
158 sleep in subsequent experiments.

159

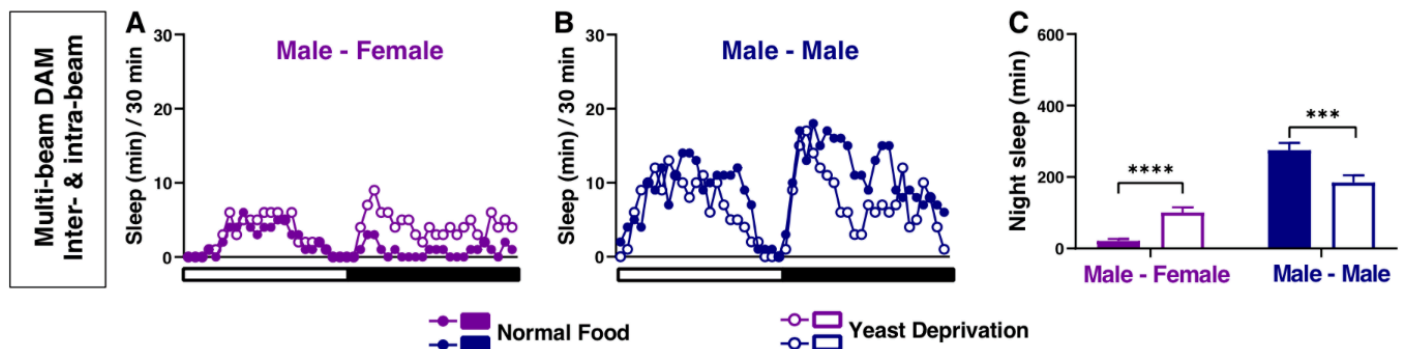

160

161 **Figure 1-figure supplement 3. Yeast deprivation modulates the balance between sleep and**  
162 **courtship: multi-beam data including local movements.**

163 **(A-B)** Sleep profile in 30 min intervals for MF **(A)** or MM **(B)** pairs in the normal food or yeast  
164 deprivation condition shown in Figure 1E-F. Sleep was analyzed based on combined inter-beam

165 (movement across beams) and intra-beam movements (local movements within a single beam)  
166 using multi-beam monitors. **(C)** Nighttime sleep for flies shown in **(A)** and **(B)**. \*\*\* $p < 0.001$ , \*\*\*\* $p <$   
167  $0.0001$ , two-way ANOVA,  $p < 0.0001$  for the interaction between sex and nutritional condition,  
168 followed by Sidak post hoc test.

169

170 To determine whether the effects of the diet manipulation on MF sleep were attributable to  
171 yeast availability, we assayed the effects of adding yeast to the 5% sucrose diet and observed that  
172 the addition of 2.75% yeast was sufficient to restore the characteristic nighttime sleep suppression  
173 in MF pairs in the normal food condition (Figure 1I, J). Yeast contains both protein and lipids, and  
174 thus we next tested the effects of adding tryptone, a mixture of peptides generated by the tryptic  
175 digestion of casein, to the 5% sucrose diet. We found that the addition of 2.75% tryptone was  
176 sufficient to restore the normal nighttime sleep suppression in MF pairs (Figure 1I, J). Increasing  
177 the sucrose concentration to 7.75% to match the caloric content of 5% sucrose + 2.75% tryptone  
178 did not alter nighttime sleep in MF pairs compared to 5% sucrose (Figure 1K, L), suggesting that  
179 protein rather than caloric content is the important factor in regulating female-induced sleep loss.  
180 These data demonstrate that the balance between sleep and courtship in male flies is modulated  
181 by protein in dietary yeast.

182

### 183 **The effects of yeast deprivation on male sleep develop over multiple days but can be** 184 **reversed within a few hours**

185 In the experiments reported above, flies in the normal food condition were loaded into  
186 monitor tubes with 5% sucrose instead of normal food, because a pilot experiment suggested that  
187 food during sleep assay did not alter the effects of 6-day nutritional manipulations before the sleep  
188 assay. As a result, all flies were yeast deprived to some extent: either a little over a day (normal  
189 food condition) or a little over 7 days (yeast deprived condition) by the time of nighttime sleep  
190 assay. Therefore, our data suggest that yeast deprivation takes between 1 and 7 days to

191 significantly impact male sleep. To examine the time course of the effects of yeast deprivation on  
192 sleep in more detail, we loaded normally fed males paired with females into monitor tubes  
193 containing either normal food or 5% sucrose food (Figure 2A). Statistically significant differences in  
194 nighttime sleep between the two conditions appeared on the 3<sup>rd</sup> night, and the difference was more  
195 pronounced on the 4<sup>th</sup> night (Figure 2B, C), demonstrating that the effects of yeast deprivation on  
196 male sleep takes ~3 days to develop.

197 We next tested whether yeast-deprived males can quickly recover their characteristic  
198 female-induced sleep loss when normal diet is restored. To do so, males that were yeast deprived  
199 for several days were switched to normal food ~16 h before the sleep assay (Figure 2D). MF pairs  
200 with yeast-deprived males that were switched to normal food exhibited sleep patterns similar to  
201 those of normally fed males (Figure 2E-G). These results demonstrate that the effects of yeast  
202 deprivation on male sleep can be reversed within a day of returning to a normal diet. To examine  
203 whether a shorter exposure to normal food would suffice to reverse the effects of yeast deprivation,  
204 we first loaded yeast-deprived males paired with females into tubes containing 5% sucrose. We  
205 then transferred the MF pairs to new tubes containing either normal food or 5% sucrose (to control  
206 for the effects of handling) within the last 20 min of the light period and assayed nighttime sleep  
207 following the transfer (Figure 2H). Flies transferred to normal food exhibited significantly reduced  
208 sleep compared to flies transferred to sucrose food, which becomes apparent within 2 h of the  
209 transfer (Figure 2I, J). Together, our data demonstrate that yeast deprivation takes multiple days to  
210 alter male sleep patterns, but its effects can be reversed within two hours of normal feeding.

211

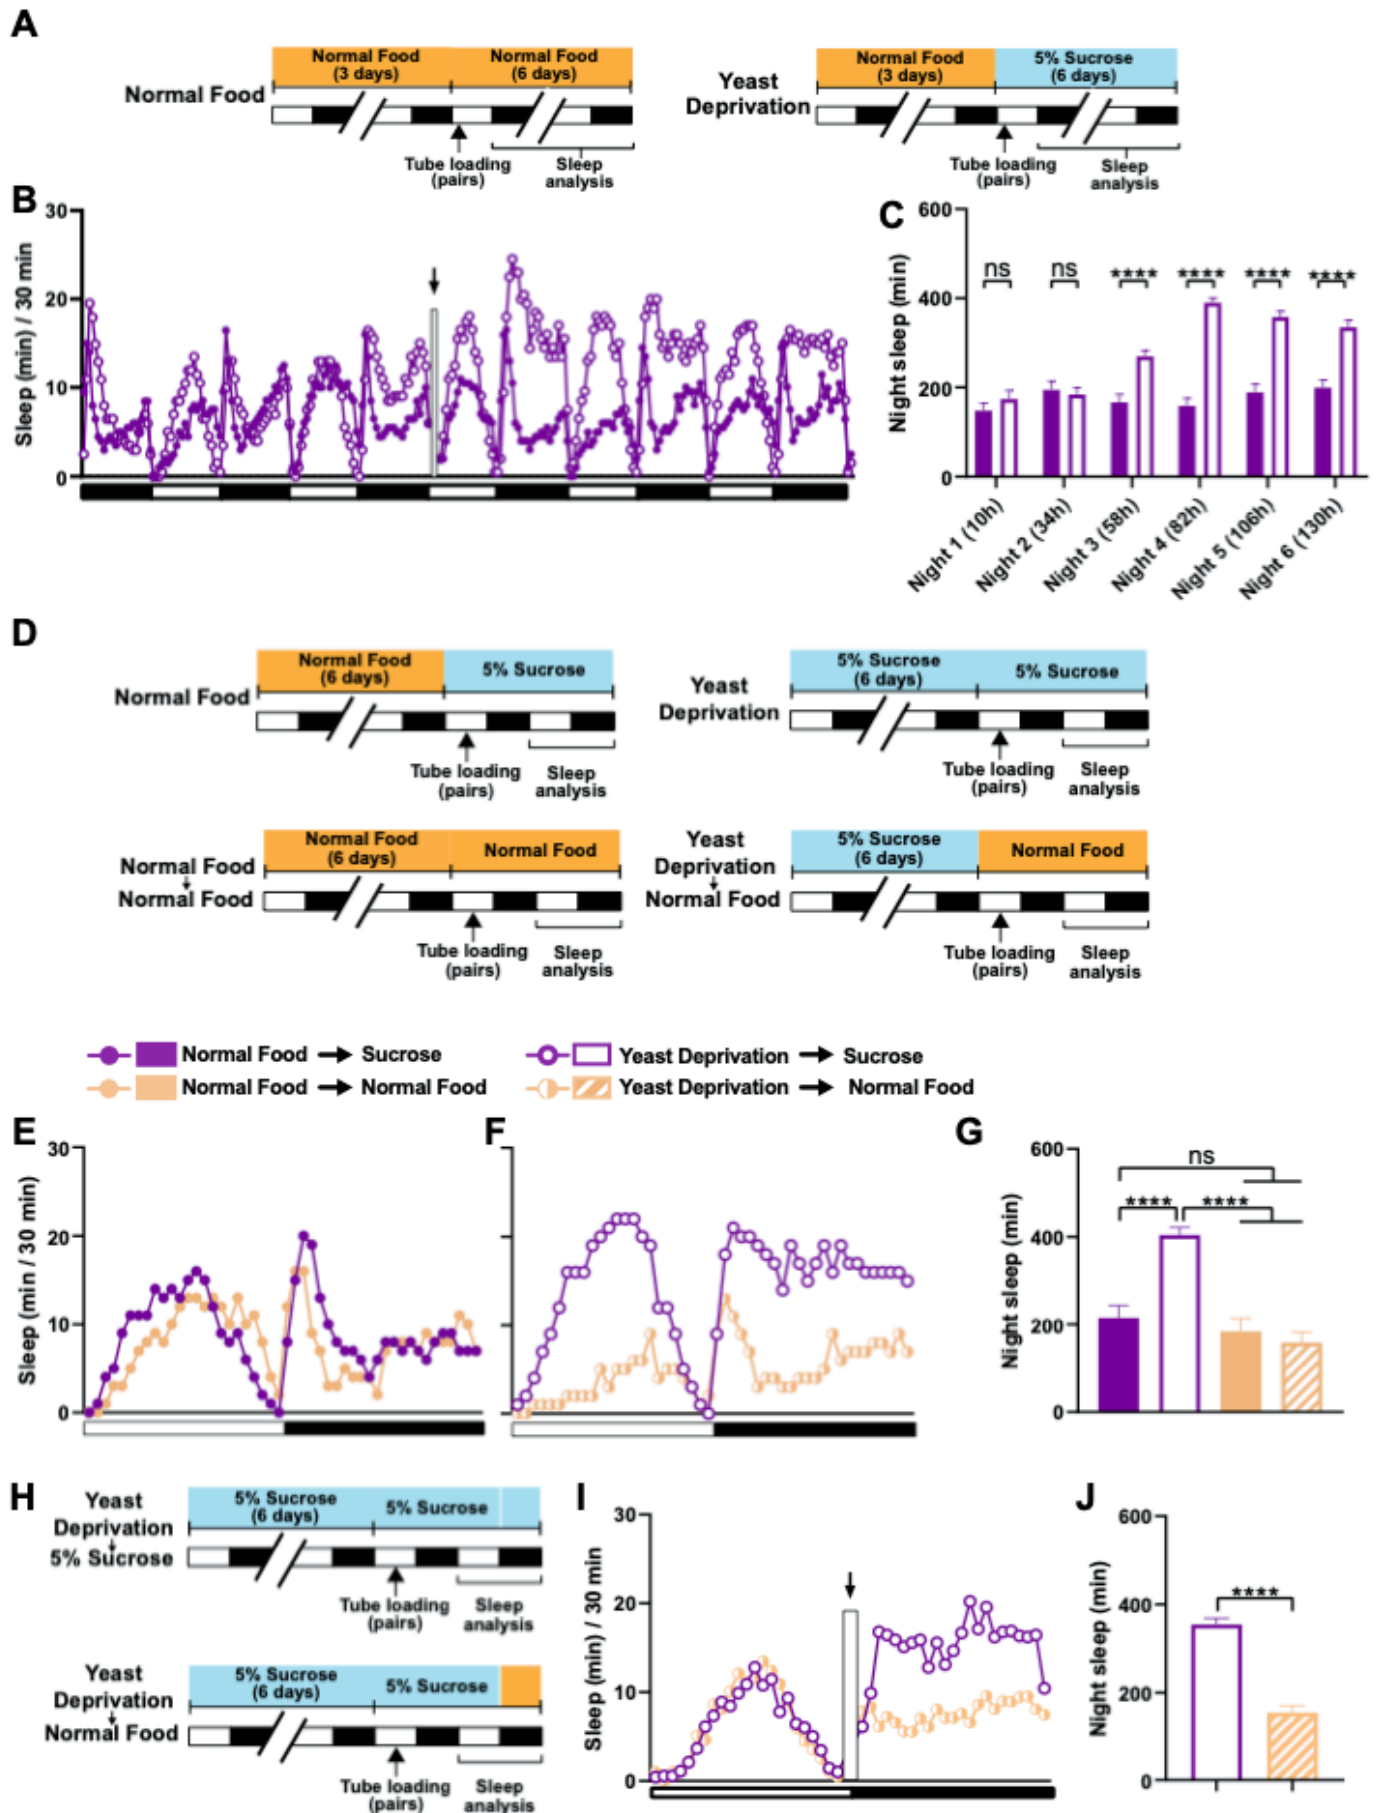

213 **Figure 2. The effects of yeast deprivation on male sleep develop over multiple days but can**  
214 **be reversed within a few hours**

215 **(A)** Schematic diagram of the experimental design for **(B)** and **(C)**. Normally fed MF pairs were  
216 loaded into tubes containing 5% sucrose or normal food between ZT 1-2, and sleep was assayed  
217 for 6 nights, starting at ZT 12 on the loading day. **(B)** Sleep profile in 30 min intervals for normally  
218 fed MF pairs loaded into tubes containing either 5% sucrose food or normal food. Flies were  
219 transferred to new tubes after 3 days to circumvent the potential problem of larval movements  
220 interfering with sleep measurements. The rectangle and arrow indicate the time of transfer. N = 59-  
221 60. **(C)** Nighttime sleep for the flies shown in **(B)**. **(D)** Schematic diagram of the experimental  
222 design for **(E)**, **(F)** and **(G)**. After 6 days in the indicated nutritional conditions, MF pairs were  
223 loaded into tubes containing either 5% sucrose or normal food. **(E)** Sleep profile in 30 min intervals  
224 for MF pairs in the normal food condition loaded into tubes containing either 5% sucrose food or  
225 normal food. **(F)** Sleep profile in 30 min intervals for MF pairs in the yeast deprivation condition  
226 loaded into tubes containing either 5% sucrose food or normal food. N = 31 - 32. **(G)** Nighttime  
227 sleep for the flies shown in **(E)** and **(F)**. **(H)** Schematic diagram of the experimental design for **(I)**  
228 and **(J)**. MF pairs yeast-deprived for 6 days were loaded into tubes containing 5% sucrose. Flies  
229 were transferred to tubes containing either 5% sucrose or normal food at ZT 12 on the following  
230 day. **(I)** Sleep profile in 30 min intervals for yeast-deprived MF pairs transferred into tubes  
231 containing either 5% sucrose food or normal food. The rectangle and arrow indicate the time of  
232 transfer. N = 51-54. **(J)** Nighttime sleep for the flies shown in **(I)**. *Iso31* flies were used in all panels.  
233 \*\*\*\* $p < 0.0001$  and ns: not significant, two-way ANOVA followed by Sidak post hoc test **(C)**, one-  
234 way ANOVA followed by Tukey post hoc test **(G)**, unpaired t-test **(J)**.

235

236 **Yeast deprivation does not impair the ability to perform reproductive behaviors in males**

237 Males may prioritize sleep over courtship under non-optimal nutritional conditions. Under a  
238 normal nutritional condition, males forgo sleep to engage in courtship at night. However, nutritional  
239 restriction, which likely results in unfavorable reproductive outcomes, may tip the balance toward  
240 sleep. Alternatively, male flies may have difficulty courting and mating after an extended period of  
241 yeast deprivation. To distinguish between these possibilities, we performed courtship assays  
242 between ZT 1-4, when flies are generally awake. We paired virgin males and virgin females and  
243 measured the courtship index and latency under normally fed and yeast deprived conditions.  
244 Interestingly, no difference in courtship index or latency was found between the two nutritional  
245 conditions (Figure 3A-C). Similarly, yeast-deprived males were as successful at copulation as their  
246 normally fed counterparts (Figure 3D). These data show that the ability to perform reproductive

247 behaviors is not impaired by several days of yeast deprivation and suggest that nutritional  
248 conditions modulate the balance between sleep and courtship rather than courtship per se.

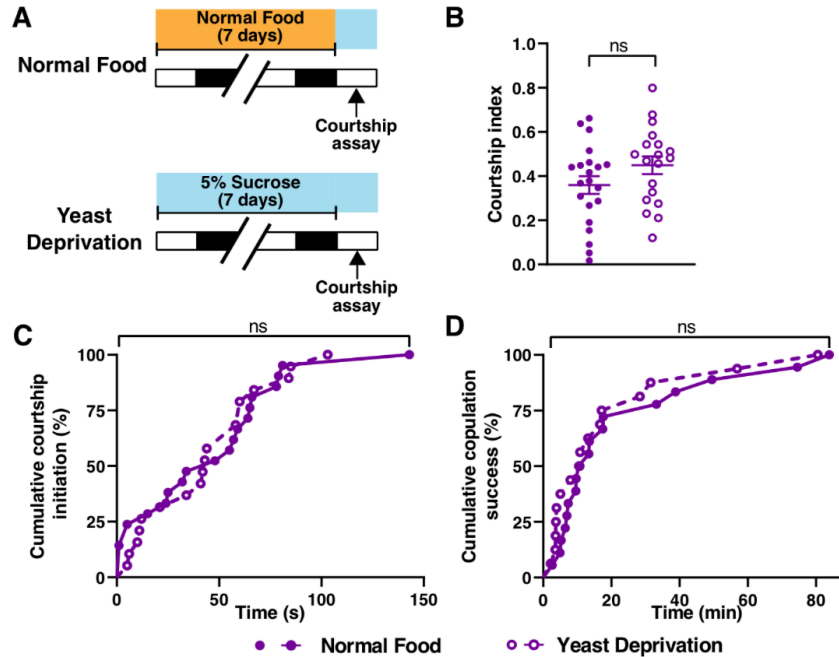

249

### 250 **Figure 3. Yeast deprivation does not impair the ability of male flies to perform reproductive** 251 **behaviors**

252 **(A)** Schematic diagram of the experimental design. After 7 days in indicated nutritional conditions,  
253 males were paired with virgin females in an arena containing 5% sucrose. **(B-D)** Courtship index  
254 **(B)**, latency to court **(C)**, and latency to copulation **(D)** in males in the normal food or yeast  
255 deprivation condition. N = 19 -21. Courtship/mating assay was performed between ZT 1-4. *Iso31*  
256 flies were used in all panels. ns: not significant, unpaired t-test **(B)**; log-rank test **(C, D)**.

257

### 258 **Dopaminergic neurons projecting to the protocerebral bridge act downstream of male-** 259 **specific P1 neurons**

260 Male-specific P1 neurons are primarily known for the control of courtship behaviors  
261 (Kohatsu et al., 2011; Pan et al., 2012; von Philipsborn et al., 2011). However, our previous work  
262 and work from other groups have established that activation of P1 neurons leads to sleep  
263 suppression, suggesting that they also play a role in regulating sleep. (Beckwith et al., 2017; Chen

264 et al., 2017; Machado et al., 2017). Since yeast deprivation impacts the balance between sleep  
265 and courtship, we examined whether the sleep-suppressive effects of P1 activation are modulated  
266 by nutrition. As observed previously, activation of P1 neurons using the P1 split Gal4 driver  
267 (Inagaki et al., 2014) and the warmth-sensitive TrpA1 channel (Hamada et al., 2008) resulted in  
268 decreased sleep in normally fed males (Figure 4A-C). Interestingly, the sleep suppressing effects  
269 of P1 activation was absent (for daytime sleep) or reduced (for nighttime sleep) in male flies that  
270 were yeast deprived for 8 days (6 days before loading and 2 days after loading) prior to activation  
271 (Figure 4B, C). This suggests that P1 neurons or the circuit downstream of P1 neurons are  
272 modulated by dietary yeast.



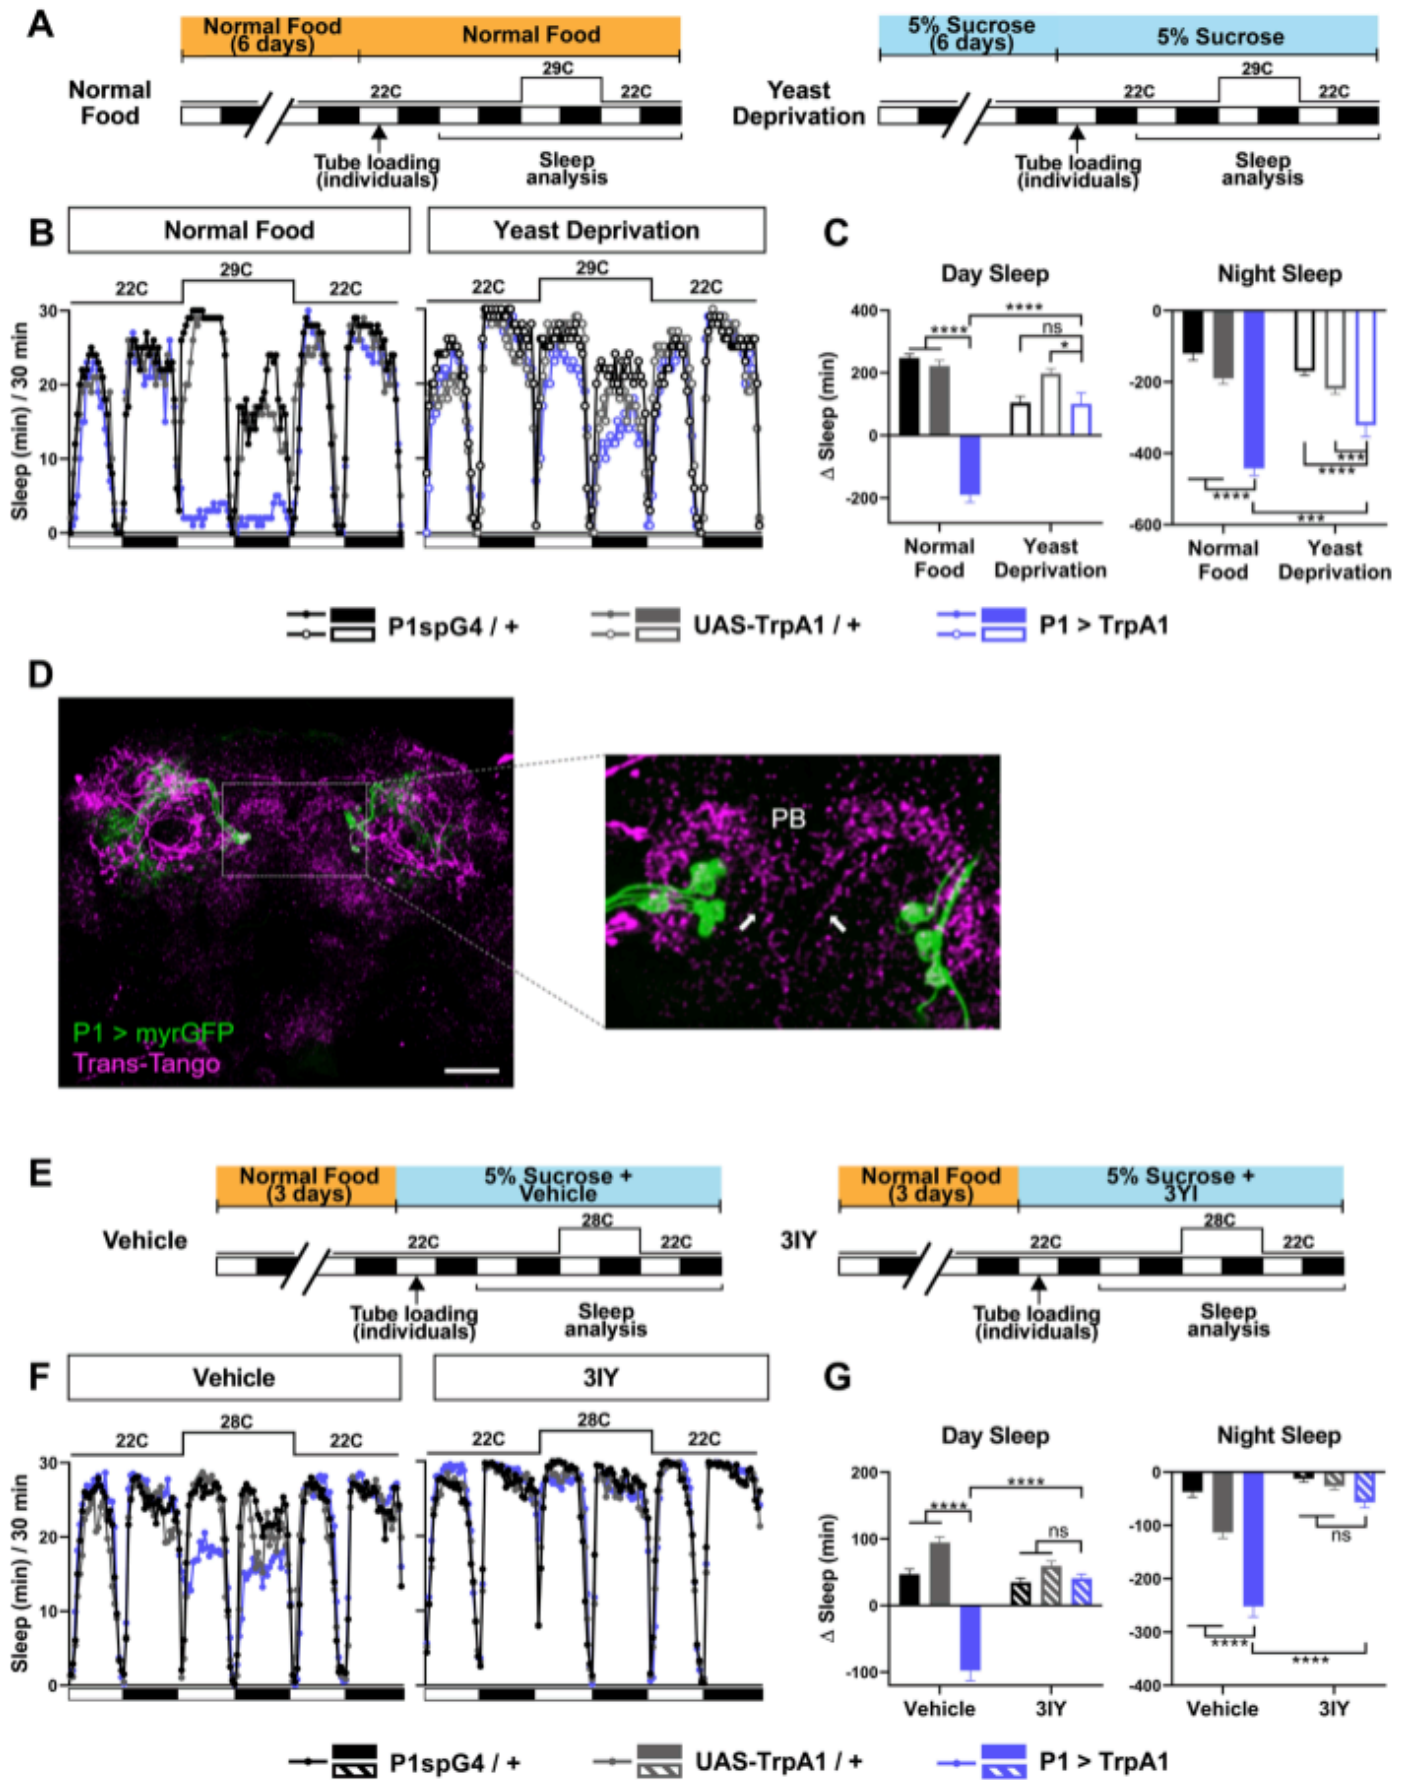



274 **Figure 4. Yeast deprivation and inhibition of dopamine signaling impairs the wake-**  
275 **promoting effects of P1 activation, and trans-Tango tracing identifies potential downstream**  
276 **targets of P1 neurons.**

277 **(A)** Schematic diagram of the experimental design for **(B)** and **(C)**. **(B)** Sleep profiles in 30 min  
278 intervals for experimental (P1 > TrpA1) and parental control (P1-spG4 / + and UAS-TrpA1 / +)  
279 males in normal food or yeast deprivation conditions, loaded into tubes containing 5% sucrose. N =  
280 29 - 32. TrpA1 was activated by raising the temperature from 22°C to 29°C. **(C)** Daytime and  
281 nighttime sleep change (sleep at 29°C – baseline sleep at 22°C) for flies shown in **(B)**. **(D)**  
282 Confocal projection of an adult male brain in which trans-Tango was driven by P1 split Gal4  
283 (spG4). Presynaptic P1 neurons express myrGFP (green) and postsynaptic targets express  
284 mtdTomato (red). Right image shows a magnification of the PB region, with postsynaptic neurons  
285 that innervate the PB. Arrows indicate descending projections used to identify DA-PB neurons.  
286 Scale bar represents 50 μm. **(E)** Sleep profiles in 30 min intervals for experimental (P1 > TrpA1)  
287 and parental control (P1-spG4 / + and UAS-TrpA1 / +) male flies. Flies were raised on normal food  
288 and individually loaded into tubes containing 5% sucrose supplemented with vehicle (propionic  
289 acid) or 3IY (inhibitor of dopamine synthesis). N = 40 - 48. TrpA1 was activated by raising the  
290 temperature from 22°C to 28°C. **(G)** Daytime and nighttime sleep change (sleep at 28°C – baseline  
291 sleep at 22°C) for flies shown in **(F)**. \*\*\*p < 0.001, \*\*\*\*p < 0.0001, ns: not significant, two-way  
292 ANOVA, followed by Tukey post hoc test **(C)** and **(G)**; p < 0.0001 for the interaction between  
293 genotype and nutritional condition **(C)**; p < 0.0001 for the interaction between genotype and drug  
294 condition **(G)**.

295

296 Previous studies have identified several neuronal clusters that act downstream of P1  
297 neurons to regulate courtship (Kohatsu et al., 2011; von Philipsborn et al., 2011). However, little is  
298 known about the sleep circuit downstream of P1 neurons. DN1 clock neurons have been shown to  
299 act both upstream and downstream of P1 neurons for sleep regulation, but the DN1-P1  
300 connections appear to be indirect (Chen et al., 2017). To identify candidate neurons acting directly  
301 downstream of P1 for sleep regulation, we employed the trans-Tango trans-synaptic tracing  
302 technique (Talay et al., 2017). By introducing genetically engineered ligand-receptor pairs, trans-  
303 Tango allows induction of mtdTomato expression in postsynaptic partners of defined presynaptic  
304 neurons. Several neuronal clusters were revealed by trans-Tango as potential postsynaptic  
305 partners of the P1 cluster (Figure 4D). They included PB-projecting neurons with descending  
306 projections in the midline.

307 We selected the PB-projecting neurons for further investigation for several reasons. First,  
308 the PB is a compartment of the central complex, a set of neuropils in the center of the brain, and  
309 has extensive connections with the other central complex compartments: the fan-shaped body  
310 (FB), ellipsoid body (EB), and noduli (NO). Notably, several groups of central complex neurons  
311 projecting to the FB and EB have been implicated in sleep regulation (Donlea et al., 2014, 2011;  
312 Liu et al., 2012, 2016; Pimentel et al., 2016; Ueno et al., 2012). Thus, it seemed likely that the PB  
313 would also be involved in sleep regulation. Second, the entire population of PB-projecting neurons  
314 have been extensively characterized (Hanesch et al., 1989; Lin et al., 2013; Young and Armstrong,  
315 2010), and only a single pair of PB-projecting neurons, named PB.b-LAL.s-PS.s, or LPsP, have  
316 descending projections in the midline (Wolff et al., 2015; Wolff and Rubin, 2018). And lastly, the  
317 LPsP neurons correspond to the only pair of dopaminergic neurons that project to the PB,  
318 previously named T1 (Alekseyenko et al., 2013; Nässel and Elekes, 1992). This is particularly  
319 interesting because we found that sleep suppression by P1 activation requires dopaminergic  
320 signaling. When dopamine synthesis was inhibited by 3-Iodo-L-tyrosine (3IY), activation of P1  
321 neurons did not suppress sleep in males (Figure 4E-G). Based on these considerations, we  
322 investigated whether the dopaminergic PB-projecting neurons, which we will refer to as DA-PB  
323 neurons, act downstream of P1 to balance sleep and courtship.

324 To confirm the anatomical connection between P1 and DA-PB neurons, we first determined  
325 whether P1 neurons send axonal projections to the PB. We expressed the presynaptic protein  
326 Synaptotagmin (Syt) fused with GFP in P1 neurons, and found a clear presence of Syt::GFP-  
327 marked presynaptic sites in the PB region, although the signal in this structure was not as strong  
328 as in other brain regions (Figure 5A). Next, we asked whether DA-PB neurons have dendrites in  
329 the PB. Previous morphological analysis suggested that DA-PB neurons contain both presynaptic  
330 and postsynaptic connections in the PB region (Wolff et al., 2015). To confirm this, we  
331 simultaneously expressed the postsynaptic marker DenMark (Nicolai et al., 2010) and presynaptic

332 GFP-tagged Syt protein (Zhang et al., 2002) in DA-PB neurons using a specific Split-Gal4 driver  
333 line (SS52578, Wolff and Rubin, 2018). We found that the postsynaptic DenMark signal was  
334 present in the PB region (Figure 5B, left image), confirming that DA-PB neurons are in a position to  
335 receive inputs from P1 neurons. The DenMark signal was also present in the lateral accessory lobe  
336 (LAL), and the presynaptic Syt::GFP signal was found mainly in the PB region (Figure 5B). Similar  
337 patterns of pre- and post-synaptic markers were observed in females, suggesting that these  
338 neurons are not sexually dimorphic at the gross morphological level (Figure 5- Figure supplement  
339 1). These data, in combination with the trans-Tango data, suggest that DA-PB neurons are direct  
340 downstream partners of P1 neurons.

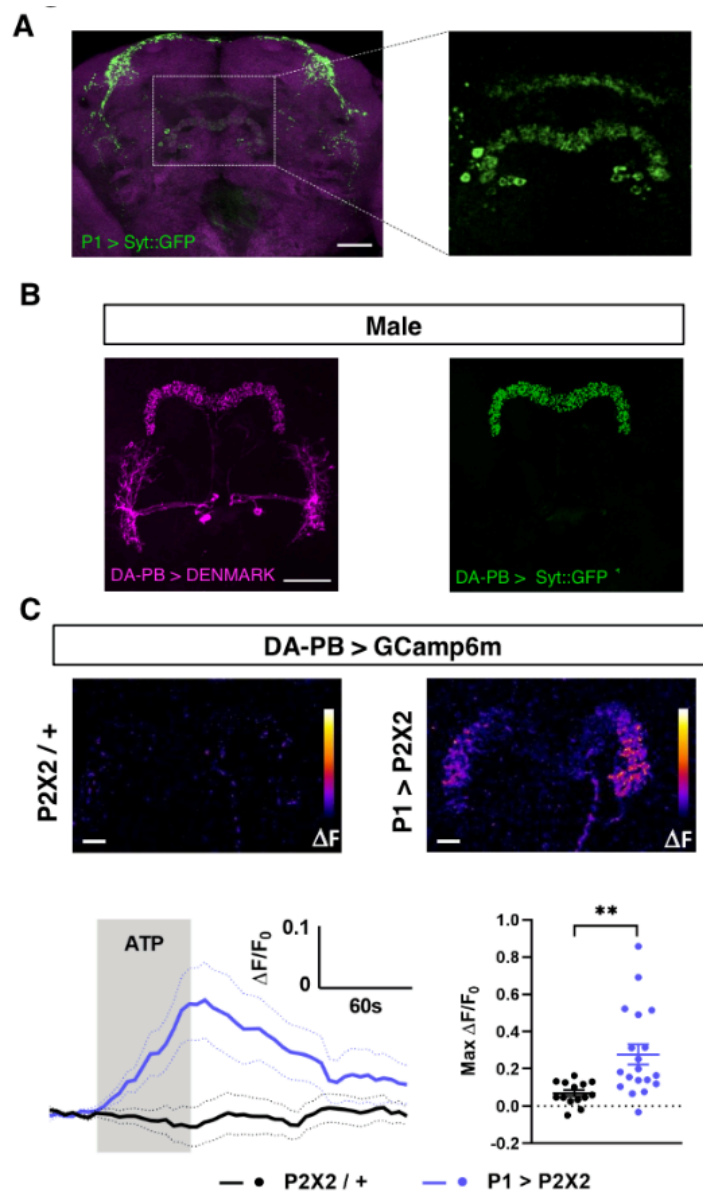

341

342 **Figure 5. Dopaminergic neurons projecting to the protocerebral bridge (DA-PB) act**  
 343 **downstream of male-specific P1 neurons.**

344 **(A)** Confocal projection of an adult male brain in which Syt::GFP was driven by P1-spG4. Anti-  
 345 Bruchpilot (BRP, magenta) was used to localize neuropil regions. The image on the right shows a  
 346 magnification of the PB region, which contains presynaptic terminals from P1 neurons. **(B)**  
 347 Confocal projection of an adult male brain in which DenMark (postsynaptic marker, left) and  
 348 Syt::GFP (presynaptic marker, right) are expressed in DA-PB neurons. Both postsynaptic and  
 349 presynaptic markers are expressed in the PB region. **(C)** Increase in GCaMP6m signal ( $\Delta F$ ) in the  
 350 PB projections of DA-PB neurons upon perfusion with ATP of a male brain expressing P2X2 in P1  
 351 neurons (P1 > P2X2, top right) or a genetic control (P2X2/+, top left). Fluorescence traces (bottom  
 352 left) and peak responses (bottom right) for normalized GCaMP6m response ( $\Delta F/F_0$ ) in the PB  
 353 projections of DA-PB neurons in response to P1 activation (blue, P1 > P2X2) compared with the  
 354 genetic control (black, P2X2/+). R71G01-lexA was used to express P2X2 in P1 neurons and  
 355 SS52578 spG4 was used to express GCaMP6m in DA-PB neurons. Grey rectangle indicates 2.5

356 mM ATP perfusion. N = 14 - 19. Scale bars represent 50  $\mu$ m in (A-B) and 10  $\mu$ m in (C). \*\* $p < 0.01$ ,  
357 unpaired t-test with Welch's correction for unequal variances.

358

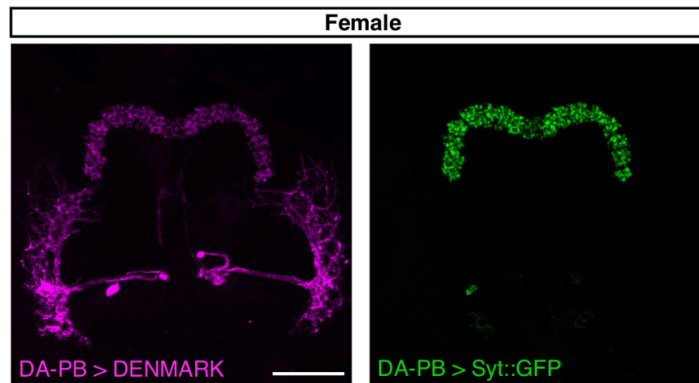

359

360 **Figure 5-figure supplement 1. Female DA-PB neurons show similar projection patterns as**  
361 **male counterparts.**

362 Confocal projection of an adult female brain in which DenMark (postsynaptic marker, left) and  
363 Syt::GFP (presynaptic marker, right) are expressed in DA-PB neurons. Both postsynaptic and  
364 presynaptic markers are expressed in the PB region. Scale bars represent 50  $\mu$ m.

365 We next examined whether the P1 cluster and DA-PB neurons are functionally connected.  
366 We expressed the ATP-sensitive P2X2 receptor (Lima and Miesenböck, 2005) in P1 neurons and  
367 the calcium sensor GCaMP6m (Chen et al., 2013) in DA-PB neurons. We found that activation of  
368 P1 cells using 2.5 mM ATP perfusion led to a marked increase in GCaMP6m signal in the PB  
369 region of DA-PB neurons, compared with controls flies which did not express P2X2 (Figure 5C),  
370 pointing to an excitatory connection between P1 and DA-PB neurons. Together, these data  
371 demonstrate that DA-PB neurons are anatomically and functionally downstream of P1 neurons.

372

### 373 **DA-PB neurons regulate male sleep in a nutrition-dependent manner**

374 Since DA-PB neurons act downstream of the sleep-suppressing P1 cluster, DA-PB neurons  
375 may also be involved in sleep regulation. To test the sleep-regulatory role of DA-PB neurons in  
376 both yeast-deprived and normally fed flies, we expressed TrpA1 channel in DA-PB neurons and

377 activated them by increasing the ambient temperature (Figure 6A). Normally fed males with  
 378 activated DA-PB neurons showed small, but significant sleep suppression during the nighttime  
 379 relative to control males (Figure 6B, D). Notably, the sleep-suppressing effects of DA-PB activation  
 380 were not detectable in yeast-deprived males (Figure 6C, D), suggesting that the impact of DA-PB  
 381 activation depends on the nutritional conditions. Although normally fed females with activated DA-  
 382 PB neurons showed significant differences in sleep compared to both parental controls (Figure 6E,  
 383 G), the differences were in opposite directions, and yeast-deprived females with activated DA-PB  
 384 neurons exhibited a similar amount of sleep as one of the parental controls (Figure 6F, G). These  
 385 results do not support the role of DA-PB neurons in female sleep. Together, our data show that  
 386 DA-PB neurons are involved in nutrition-dependent sleep regulation in males.

387

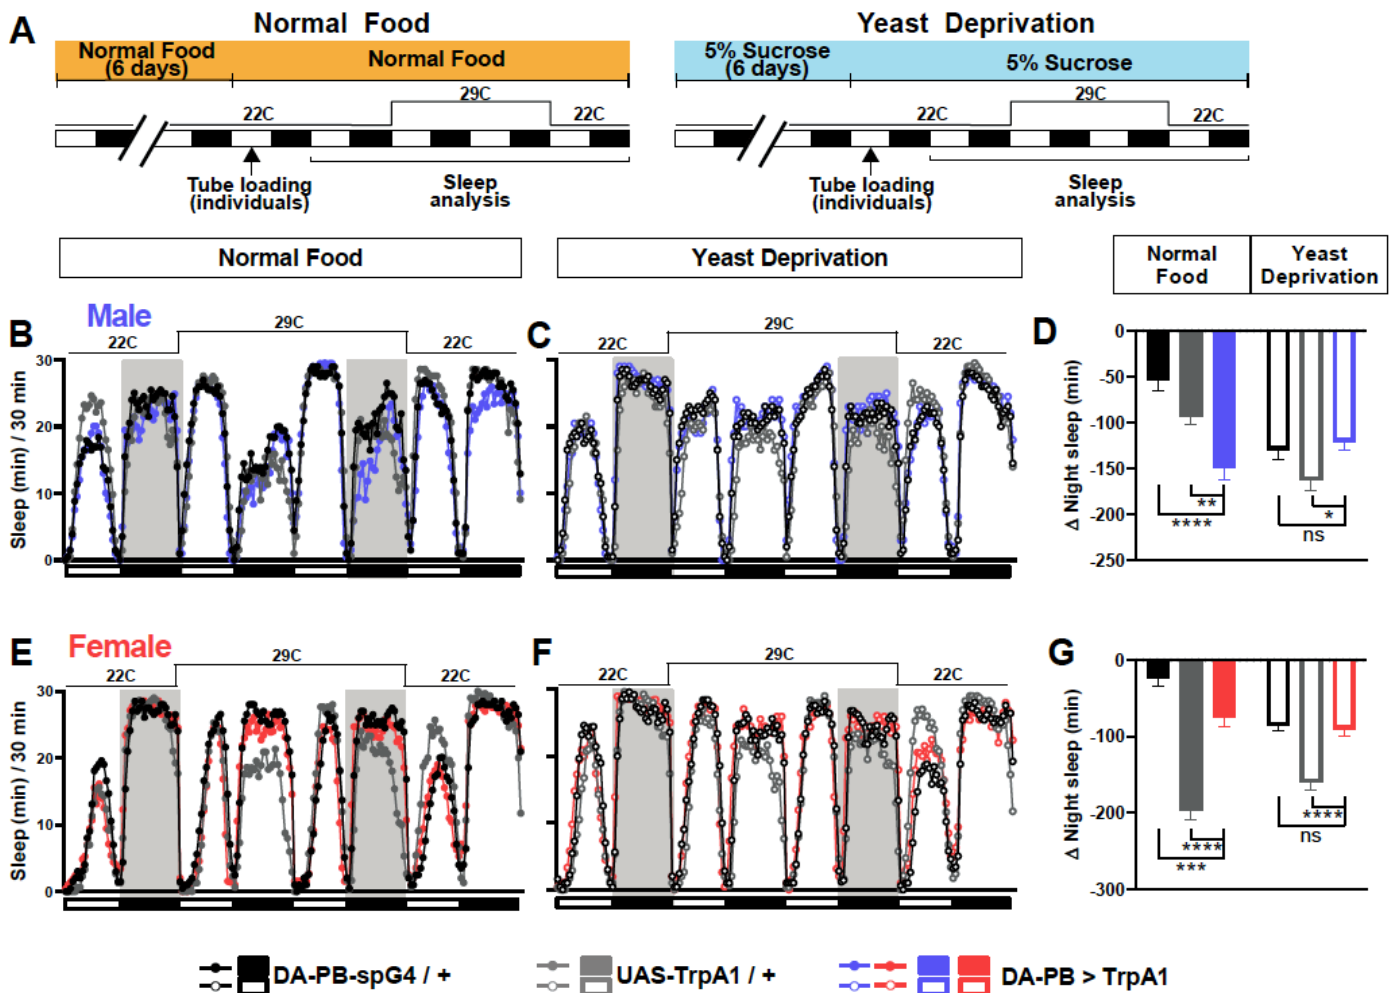

388



389 **Figure 6. DA-PB neurons regulate male sleep in a nutrition-dependent manner.**

390 **(A)** Schematic diagram of the experimental design. After 6 days in vials containing normal food or  
391 5% sucrose food, male and female flies were loaded individually into tubes. **(B-C)** Sleep profiles in  
392 30 min intervals for experimental (DA-PB > TrpA1) and parental control (DA-PB-spG4 / + and  
393 UAS-TrpA1 / +) male flies in the normal food **(B)** or yeast deprivation **(C)** condition. N = 59-62.  
394 TrpA1 was activated by raising the temperature from 22°C to 29°C. **(D)** Nighttime sleep change  
395 (sleep during the 2<sup>nd</sup> night at 29°C – baseline night sleep at 22°C) for the flies shown in **(B)** and  
396 **(C)**. **(E-F)**. Sleep profiles in 30 min intervals of experimental (DA-PB > TrpA1) and parental control  
397 (DA-PB-spG4 / + and UAS-TrpA1 / +) female flies in the normal food **(E)** and yeast deprivation **(F)**  
398 condition. N = 48-56. **(G)** Nighttime sleep change for the flies shown in **(E)** and **(F)**. \*\*\*p < 0.001,  
399 \*\*\*\*p < 0.0001 and ns: not significant, two-way ANOVA, p < 0.0001 for the interaction between  
400 genotype and nutritional condition, followed by Tukey post-hoc test **(C-F)**.

401

402 **A screen identifies an additional PB-projecting neuronal group that regulates sleep**

403 To map neurons downstream of DA-PB neurons, we performed trans-Tango trans-synaptic tracing  
404 experiments (Talay et al., 2017). We found that neurons that arborize in other central complex  
405 compartments, the EB, FB, and NO, are the major postsynaptic partners of DA-PB neurons (Figure  
406 7A). To determine the identity of specific neuronal groups acting downstream of DA-PB neurons,  
407 we conducted a screen of PB-projecting neuronal groups. Since we found that activation of DA-PB  
408 neurons suppresses sleep in normally fed males but not in females, we examined sleep in both  
409 males and females under the normal food conditions. We activated various PB-projecting neuronal  
410 groups using previously characterized split-Gal4 lines (Wolff and Rubin, 2018) and UAS-TrpA1.  
411 The screen identified two candidate neuronal groups that regulate sleep in males (Figure 7B): P-  
412 EG neurons (SS02198) projecting from the PB to the EB and gall (Figure 7C; Wolff and Rubin,  
413 2018) and P-FN<sub>m-p</sub> neurons (SS52244) projecting from the PB to the ventral FB and medial and  
414 posterior NO3 (Figure 7-supplementary figure 1A) . Further experiments confirmed that activation  
415 of P-EG neurons leads to nighttime sleep suppression in males, but not in females (Figure 7D, E,  
416 supplemental figure 1A-C). However, we could not confirm sleep suppression by P-FN<sub>m-p</sub>  
417 activation, suggesting that these neurons play a minor role in sleep regulation, if any (Figure 7–

418 supplement 1D-F). Overall, our data suggest that P-EG neurons interact with DA-PB neurons and  
 419 regulate sleep in a sex-dependent manner.

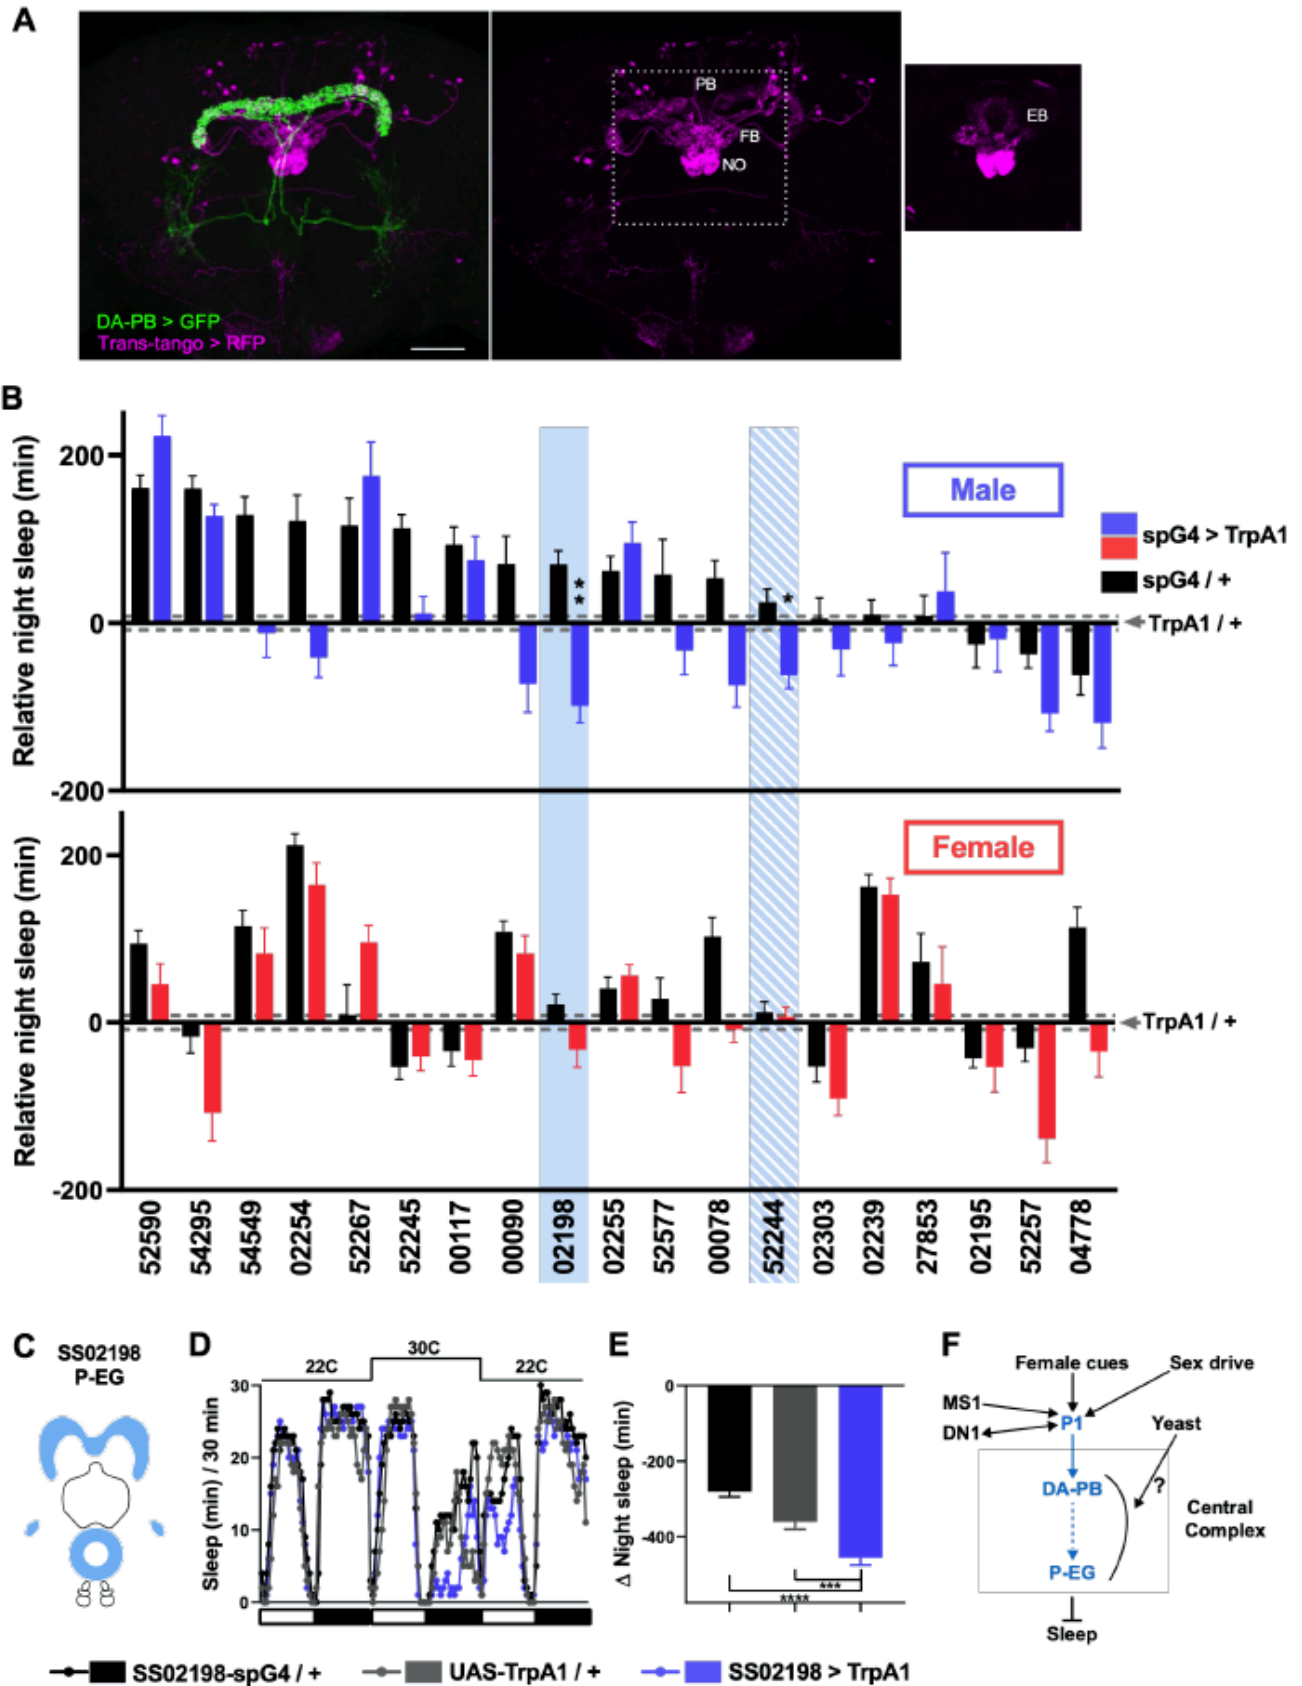



421 **Figure 7. A screen identifies additional PB-projecting neurons that regulate sleep.**

422 **(A)** Confocal projection of an adult male brain in which trans-Tango was driven by the SS52578  
423 DA-PB spG4 driver. Presynaptic DA-PB neurons express MyrGFP (green) and postsynaptic  
424 targets express mtdTomato (red). Postsynaptic targets were detected in the PB, FB and NO  
425 (middle panel) as well as in the EB (right panel; since expression in the EB was masked in the full  
426 projection, only two image slices were included in the projection). Scale bar: 50  $\mu$ m. **(B)** Nighttime  
427 sleep in individual, normally fed males (top) and females (bottom) in response to activation of  
428 various neuronal groups projecting to the PB. TrpA1 was activated by raising the temperature from  
429 22°C to 30°C. Labels on the X-axis refer to the identity of the SS spG4 lines from the Rubin lab  
430 spG4 collection. The difference in nighttime sleep for each spG4 line with respect to the UAS-  
431 TrpA1 control is plotted. Blue and red bars represent male and female experimental groups (spG4  
432 > TrpA1), respectively, and black bars represent the Gal4 control (spG4 / +). Dashed grey lines  
433 indicate the SEM of the UAS-TrpA1 / + control. N = 144 - 148 for UAS-TrpA1 / + controls, and N =  
434 15 - 52 for experimental groups and Gal4 / + controls. Blue rectangles highlight spG4 lines  
435 associated with significant sleep changes in males relative to both controls. The solid rectangle  
436 represents a spG4 line confirmed in a re-test, whereas the striped rectangle represents a line not  
437 confirmed in a re-test. None of the sleep changes in females were significant relative to both  
438 controls. For simplicity, non-significant differences are not indicated. **(C)** Schematic diagrams of the  
439 expression pattern of the SS02198 spG4 driver (based on Wolff and Rubin, 2018). **(D)** Sleep  
440 profiles in 30 min intervals for experimental (SS02198 > TrpA1) and parental control (SS02198-  
441 spG4 / + and UAS-TrpA1 / +) males. Normally fed flies were loaded into tubes with 5% sucrose.  
442 TrpA1 was activated by raising the temperature from 22°C to 30°C. N = 27-32. **(E)** Nighttime sleep  
443 change (sleep at 30°C – baseline sleep at 22°C) for the flies shown in **(D)**. \*p < 0.05, \*\*p < 0.01,  
444 \*\*\*p < 0.001, Brown-Forsythe and Welch ANOVA for unequal variances followed by Dunnett T3  
445 post hoc test **(B)**, one-way ANOVA followed by Dunnett post hoc test **(D)**. **(F)** A working model of  
446 the neural mechanisms integrating sleep drive, sex drive, and yeast hunger in *Drosophila* males.  
447 Previous studies have shown that P1 neurons integrate female and male pheromonal cues from  
448 multiple Fru<sup>M</sup>-expressing neuronal clusters (Kohatsu et al., 2011; Stockinger et al., 2005),  
449 octopaminergic arousal signal from MS1 neurons (Machado et al., 2017), and circadian information  
450 from DN1 clock neurons (Chen et al., 2017). Current work suggests that DA-PB neurons act  
451 downstream of P1 neurons and upstream of P-EG neurons to promote wakefulness in a male-  
452 specific and nutrition-dependent manner.

453

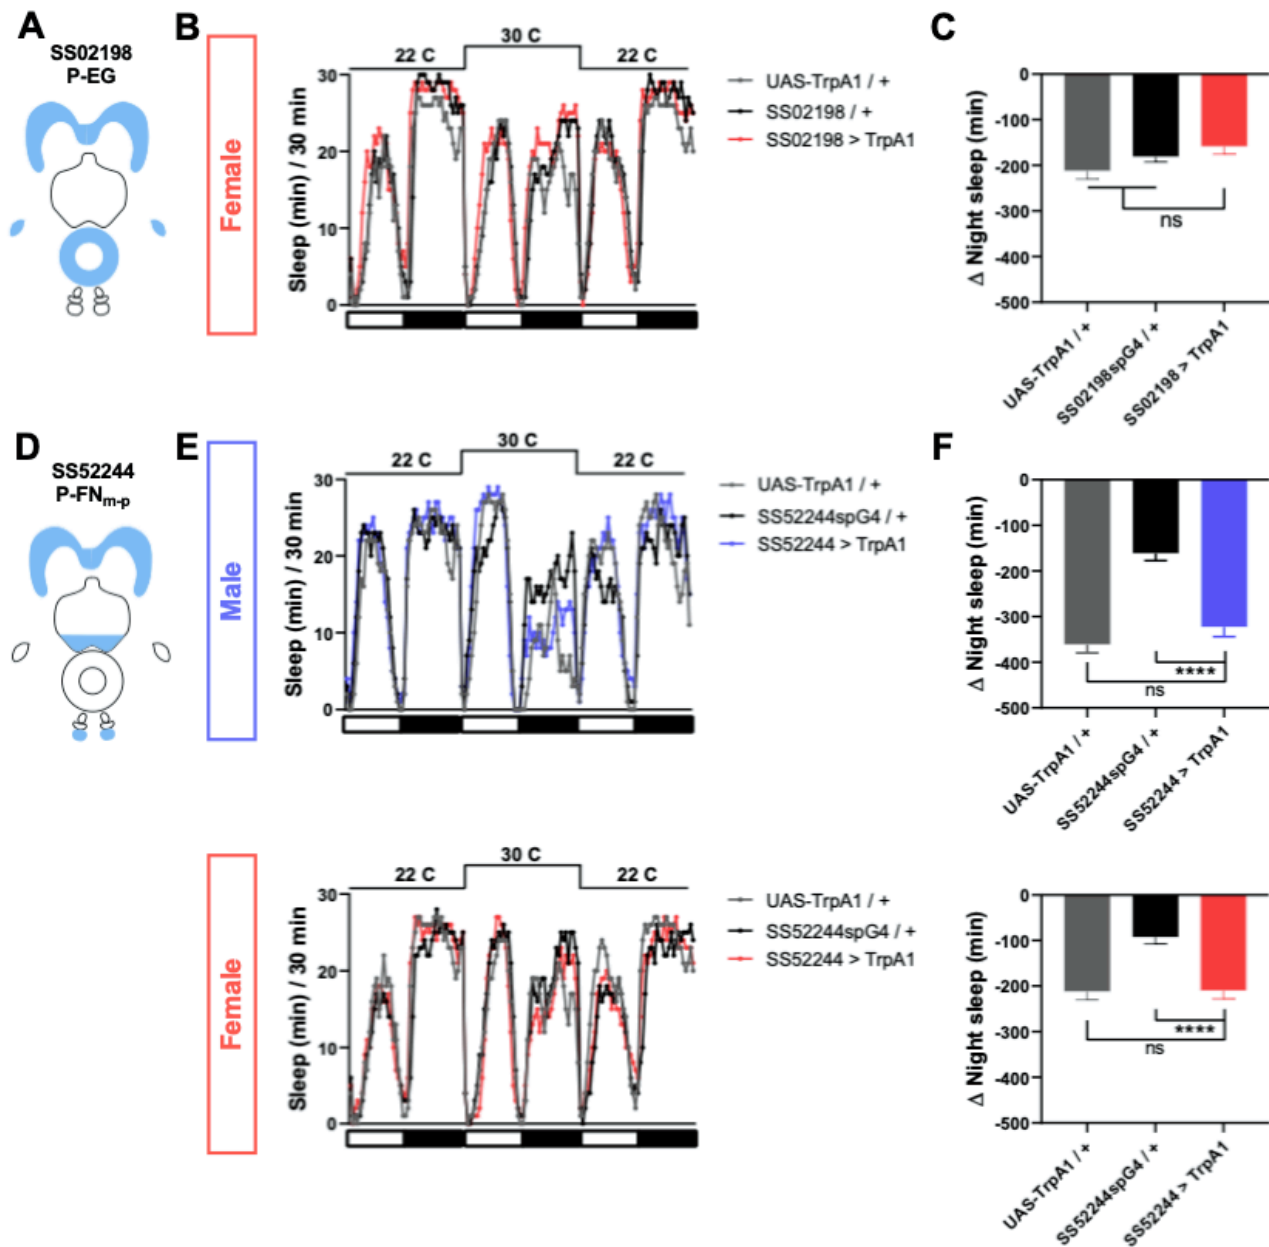

454

455 **Figure 7-figure supplement 1. P-EG activation does not affect female sleep, and P-FN<sub>m-p</sub>**  
 456 **activation has little effect on sleep in males and females.**

457 **(A)** Schematic diagrams of the expression pattern of the SS02198 spG4 driver. **(B)** Sleep profiles  
 458 in 30 min intervals for experimental (SS02198 > TrpA1) and parental control (SS02198-spG4 / +  
 459 and UAS-TrpA1 / +) female flies. Normally fed flies were loaded into tubes with 5% sucrose. TrpA1  
 460 was activated by raising the temperature from 22°C to 30°C. N = 31. **(C)** Nighttime sleep change  
 461 (sleep at 30°C – baseline sleep at 22°C) for the flies shown in **(B)**. **(D)** Schematic diagrams of the  
 462 expression pattern of the SS52244 spG4 driver. **(E)** Sleep profiles in 30 min intervals for  
 463 experimental (SS52244 > TrpA1) and parental control (SS52244-spG4 / + and UAS-TrpA1 / +)  
 464 flies. TrpA1 was activated by raising the temperature from 22°C to 30°C. N = 30-32 for males and  
 465 20-32 for females. **(F)** Nighttime sleep change (sleep at 30°C – baseline sleep at 22°C) for the flies  
 466 shown in **(E)**. ns: not significant, one-way ANOVA followed by Dunnet post hoc test.

## 467 **Discussion**

468 The integration of environmental cues and internal states is critical for selecting behaviors that  
469 optimize animals' evolutionary fitness under varying conditions. Whereas sleep is thought to be  
470 regulated mainly by the circadian and homeostatic processes (Borbély, 1982), other motivational  
471 factors play critical roles in modulating sleep. Competition between sleep and other needs is a  
472 general phenomenon documented in many species. Examples include sleep suppression in  
473 migrating birds (Rattenborg et al., 2016, 2004), in male arctic sandpipers during an annual 3-week  
474 mating season (Lesku et al., 2012), and in flies and worms during unexpected starvation (Goetting  
475 et al., 2018; Keene et al., 2010). Another example are the Mexican cavefish, who live in an  
476 environment with limited and seasonal food availability. They show increased sleep upon  
477 starvation, suggesting that they sleep more during the dry season of food scarcity to conserve  
478 energy and sleep less during the wet season of relative food abundance to forage (Jaggard et al.,  
479 2017). In addition, we and others have previously shown that when presented with a female  
480 partner, *Drosophila* males forgo nighttime sleep to engage in courtship (Beckwith et al., 2017;  
481 Machado et al., 2017). Beckwith et al. (2017) further showed that male flies do not exhibit rebound  
482 sleep after prolonged wakefulness in the presence of females and that female pheromone can  
483 suppress male rebound sleep after sleep deprivation by mechanical stimulation. These results  
484 suggest that male sexual arousal can inhibit sleep even when sleep drive is high. We also showed  
485 previously that increased sleep drive (due to sleep deprivation) or reduced sex drive (due to recent  
486 copulations) tilts the sleep-courtship balance toward more sleep and less courtship during the night  
487 (Machado et al., 2017). Our present results show that yeast deprivation also tilts the balance  
488 toward more nighttime sleep.

489 Interestingly, yeast deprivation has little effect on daytime courtship in our study. Previous  
490 research on the effects of dietary yeast on male reproductive fitness found variable results  
491 depending on the experimental design. Yeast content had little or a non-monotonic influence on

492 the number of offspring when males competed with other males (Fricke et al., 2008). On the other  
493 hand, the amount of dietary yeast was negatively correlated with the number of offspring when no  
494 male-male competition was involved (Zajitschek et al., 2013). However, these studies did not  
495 include a condition where yeast was absent, and thus do not provide insights into yeast  
496 deprivation's effects on male sexual performance. Our current data suggest that dietary yeast  
497 influences the male fly's willingness to stay awake to engage in courtship at night, but does not  
498 impair their ability to court during the day when they are usually awake. Since yeast provides  
499 essential nutrients for larval development (Becher et al., 2012), our findings suggest that flies  
500 engage in a sophisticated cost-benefit analysis that takes nutritional status into account in deciding  
501 whether the potential benefit of pursuing female partners is worth the cost of losing sleep.

502 Dietary yeast is the primary source of protein and lipids in the standard laboratory food for  
503 flies. Our finding that tryptone can substitute for yeast demonstrates that the effects of yeast  
504 deprivation are primarily due to the lack of protein. Previous studies have identified several  
505 neuronal populations that mediate the effects of dietary protein and amino acids on adult  
506 *Drosophila* behavior. These include dopaminergic Wedge neurons, EB Ring5 neurons, and  
507 peptidergic neurons expressing diuretic hormone-44, insulin-like peptide-2, or leucokinin (Brown et  
508 al., 2020; Ki and Lim, 2019; Liu et al., 2017; Murphy et al., 2016; Yang et al., 2018; Yurgel et al.,  
509 2019). It would be interesting to determine whether these neurons are involved in modulating the  
510 sleep-courtship balance by nutrition. It is noteworthy that DA-PB neurons have been shown to  
511 regulate of male aggression (Alekseyenko et al., 2013). Male flies engage in aggressive behavior  
512 to compete for resources such as food and female partners (Lim et al., 2014; Yuan et al., 2014).  
513 DA-PB neurons may be involved in integrating pheromonal cues and nutritional status to regulate  
514 the balance between sleep and aggression or courtship, depending on the context.

515 A number of neuronal populations that regulate sleep have been identified (Artiushin and  
516 Sehgal, 2017; Tomita and Kume, 2017), and among them are two distinct populations in the

517 central complex: EB R5 neurons and the dorsal FB (Donlea et al., 2014, 2011; Liu et al., 2012,  
518 2016; Pimentel et al., 2016; Ueno et al., 2012). In addition, Ueno et al. (2012) showed that  
519 activation of dopaminergic PPM3 neurons projecting to the ventral FB leads to sleep suppression,  
520 while Dag et al. (2019) showed that ventral FB neurons can be sleep-promoting. Our results show  
521 that the PB region in the central complex is also involved in sleep regulation. Activation of DA-PB  
522 neurons, as well as P-EG neurons acting downstream of them to convey information from the PB  
523 to the EB, suppress sleep in males. It would be interesting to determine whether P-EG neurons  
524 interact with the previously described neurons projecting to the EB. Based on the present and  
525 previous data, we propose that P1, DA-PB, and P-EG neurons, as well as previously described  
526 octopaminergic MS1 neurons and DN1 clock neurons (Chen et al., 2017; Machado et al., 2017),  
527 form a male-specific sleep circuit (Figure 7F). Our finding that DA-PB activation leads to sleep  
528 suppression in normally fed, but not yeast-deprived, males suggests that information about yeast  
529 availability is conveyed to the male sleep circuit at the level of DA-PB neurons or downstream of  
530 them. The information could be transmitted in the form of inhibitory inputs from neurons encoding  
531 yeast hunger or excitatory inputs from neurons encoding yeast satiety. Further research would be  
532 required to determine how information about yeast availability is integrated into the circuit.

533 Sleep is strongly influenced by monoaminergic neuromodulators, including dopamine,  
534 serotonin, and octopamine and its mammalian analog norepinephrine (Griffith, 2013; Joiner, 2016;  
535 Liu et al., 2019; Nall and Sehgal, 2014; Ni et al., 2019; Singh et al., 2015). We previously showed  
536 that octopamine is a significant mediator of sleep suppression by male sex drive upstream of P1  
537 neurons (Machado et al., 2017). Our present data show that dopamine signaling functions  
538 downstream of P1 neurons in the process. This is reminiscent of several studies showing that  
539 octopamine/norepinephrine acts upstream of dopaminergic neurons for diverse biological  
540 processes including memory, feeding, and addiction (Burke et al., 2012; Goertz et al., 2015; Wang  
541 et al., 2016). Octopamine/norepinephrine may provide an arousal signal that enhances

542 dopaminergic control of motivated behaviors. A similarly layered signaling may underlie the  
543 integration of sleep and other motivated behaviors in flies and mammals.

544 **Author contributions**

545

546 Conceptualization and Methodology: J.M.D. and K.K. Investigation: J.M.D., V.B., Y.Z, and D.R.M.

547 Writing – Original Draft: J.M.D. and K.K. Writing – Review & Editing: V.B., Y.Z, and D.R.M. Funding

548 Acquisition: J.M.D., and D.R.M. and K.K.; Supervision: K.K.

549

550 **Acknowledgments**

551

552 We thank Drs. David Anderson, Liqun Luo, Amita Sehgal, Tanya Wolff and Gerald Rubin and the

553 Bloomington Stock Center for fly stocks; Dr. William Joiner for the SleepLab software; Jennifer

554 Wilson for suggestions for improving the manuscript; Kyle Kennedy, Joseph Buchler,

555 Oghenerukevwe Akpoghiran, and Benjamin Peter Jenny for technical assistance; and members of

556 the Koh lab for helpful discussions on the project. This work was supported by a Pew Latin

557 American Fellowship (to J.M.D.), a predoctoral fellowship from the Portuguese Foundation for

558 Science and Technology (SFRH-BD-52321-2013 to D.R.M.), and a grant from the National Institute

559 of Neurological Disorders and Stroke (R01NS109151 to K.K).

560

561 **Competing interests**

562

563 No competing interests declared.

564 **Methods**

| <b>Key Resources Table</b>                 |                                                                     |                                     |                    |                               |
|--------------------------------------------|---------------------------------------------------------------------|-------------------------------------|--------------------|-------------------------------|
| <b>Reagent type (species) or resource</b>  | <b>Designation</b>                                                  | <b>Source or reference</b>          | <b>Identifiers</b> | <b>Additional information</b> |
| genetic reagent ( <i>D. melanogaster</i> ) | GMR71G01- <i>LexA</i>                                               | Bloomington Drosophila Stock Center | BDSC #54733        |                               |
| genetic reagent ( <i>D. melanogaster</i> ) | UAS- <i>TrpA1</i>                                                   | Bloomington Drosophila Stock Center | BDSC #26263        |                               |
| genetic reagent ( <i>D. melanogaster</i> ) | lexAop- <i>P2X2</i>                                                 | Bloomington Drosophila Stock Center | BDSC #76030        |                               |
| genetic reagent ( <i>D. melanogaster</i> ) | UAS- <i>GCaMP6m</i>                                                 | Bloomington Drosophila Stock Center | BDSC #42750        |                               |
| genetic reagent ( <i>D. melanogaster</i> ) | UAS- <i>Syt::GFP</i>                                                | Bloomington Drosophila Stock Center | BDSC #6925         |                               |
| genetic reagent ( <i>D. melanogaster</i> ) | UAS- <i>Denmark</i>                                                 | Bloomington Drosophila Stock Center | BDSC #33061        |                               |
| genetic reagent ( <i>D. melanogaster</i> ) | <i>trans-Tango</i> ;UAS- <i>myrGFP</i> ,QUAS- <i>mtdTomato-3xHA</i> | Bloomington Drosophila Stock Center | BDSC #77124        |                               |
| genetic reagent ( <i>D. melanogaster</i> ) | Iso31 ( <i>w</i> <sup>118</sup> )                                   | Bloomington Drosophila Stock Center | BDSC #3605         |                               |
| genetic reagent ( <i>D. melanogaster</i> ) | UAS- <i>HA::Syt</i>                                                 | Bloomington Drosophila Stock Center | BDSC #6925         |                               |



|                                            |                             |                         |  |                         |
|--------------------------------------------|-----------------------------|-------------------------|--|-------------------------|
| genetic reagent ( <i>D. melanogaster</i> ) | P1-split Gal4               | David Anderson          |  | (Inagaki et al., 2014)  |
| genetic reagent ( <i>D. melanogaster</i> ) | PB Split-Gal4 line, SS52578 | Janelia Research Campus |  | (Wolff and Rubin, 2018) |
| genetic reagent ( <i>D. melanogaster</i> ) | PB Split-Gal4 line, SS54295 | Janelia Research Campus |  | (Wolff and Rubin, 2018) |
| genetic reagent ( <i>D. melanogaster</i> ) | PB Split-Gal4 line, SS52590 | Janelia Research Campus |  | (Wolff and Rubin, 2018) |
| genetic reagent ( <i>D. melanogaster</i> ) | PB Split-Gal4 line, SS52245 | Janelia Research Campus |  | (Wolff and Rubin, 2018) |
| genetic reagent ( <i>D. melanogaster</i> ) | PB Split-Gal4 line, SS02254 | Janelia Research Campus |  | (Wolff and Rubin, 2018) |
| genetic reagent ( <i>D. melanogaster</i> ) | PB Split-Gal4 line, SS52267 | Janelia Research Campus |  | (Wolff and Rubin, 2018) |
| genetic reagent ( <i>D. melanogaster</i> ) | PB Split-Gal4 line, SS02255 | Janelia Research Campus |  | (Wolff and Rubin, 2018) |
| genetic reagent ( <i>D. melanogaster</i> ) | PB Split-Gal4 line, SS00117 | Janelia Research Campus |  | (Wolff and Rubin, 2018) |
| genetic reagent ( <i>D. melanogaster</i> ) | PB Split-Gal4 line, SS00090 | Janelia Research Campus |  | (Wolff and Rubin, 2018) |
| genetic reagent ( <i>D. melanogaster</i> ) | PB Split-Gal4 line, SS02198 | Janelia Research Campus |  | (Wolff and Rubin, 2018) |
| genetic reagent ( <i>D. melanogaster</i> ) | PB Split-Gal4 line, SS54549 | Janelia Research Campus |  | (Wolff and Rubin, 2018) |
| genetic reagent ( <i>D. melanogaster</i> ) | PB Split-Gal4 line, SS52577 | Janelia Research Campus |  | (Wolff and Rubin, 2018) |
| genetic reagent ( <i>D. melanogaster</i> ) | PB Split-Gal4 line, SS02239 | Janelia Research Campus |  | (Wolff and Rubin, 2018) |

|                                            |                                               |                          |                                     |                         |
|--------------------------------------------|-----------------------------------------------|--------------------------|-------------------------------------|-------------------------|
| genetic reagent ( <i>D. melanogaster</i> ) | PB Split-Gal4 line, SS27583                   | Janelia Research Campus  |                                     | (Wolff and Rubin, 2018) |
| genetic reagent ( <i>D. melanogaster</i> ) | PB Split-Gal4 line, SS02303                   | Janelia Research Campus  |                                     | (Wolff and Rubin, 2018) |
| genetic reagent ( <i>D. melanogaster</i> ) | PB Split-Gal4 line, SS00078                   | Janelia Research Campus  |                                     | (Wolff and Rubin, 2018) |
| genetic reagent ( <i>D. melanogaster</i> ) | PB Split-Gal4 line, SS52257                   | Janelia Research Campus  |                                     | (Wolff and Rubin, 2018) |
| genetic reagent ( <i>D. melanogaster</i> ) | PB Split-Gal4 line, SS02195                   | Janelia Research Campus  |                                     | (Wolff and Rubin, 2018) |
| genetic reagent ( <i>D. melanogaster</i> ) | PB Split-Gal4 line, SS52244                   | Janelia Research Campus  |                                     | (Wolff and Rubin, 2018) |
| genetic reagent ( <i>D. melanogaster</i> ) | PB Split-Gal4 line, SS04778                   | Janelia Research Campus  |                                     | (Wolff and Rubin, 2018) |
| antibody                                   | anti-GFP (rabbit polyclonal)                  | Molecular Probes         | Cat# A-21312, RRID:AB_221478        | (1:500)                 |
| antibody                                   | anti-GFP (mouse monoclonal)                   | Thermo Fisher Scientific | Cat# A-11120, RRID: AB_221568       | (1:500)                 |
| antibody                                   | anti-RFP (rabbit polyclonal)                  | Rockland                 | Cat # 600-401-379, RRID: AB_2209751 | (1:500)                 |
| antibody                                   | anti-BRP (mouse monoclonal)                   | DSHB                     | Cat# nc82, RRID: AB_2314866)        | (1:150)                 |
| antibody                                   | Alexa Fluor 488 anti-rabbit (goat polyclonal) | Thermo Fisher Scientific | Cat# A11008, RRID:AB143165          | (1:1000)                |

|                         |                                                    |                          |                              |                       |
|-------------------------|----------------------------------------------------|--------------------------|------------------------------|-----------------------|
| antibody                | Alexa Fluor 568 anti-rabbit (goat polyclonal)      | Thermo Fisher Scientific | Cat# A11011, RRID: AB_143157 | (1:1000)              |
| antibody                | Cy5 anti-mouse (goat polyclonal)                   | Thermo Fisher Scientific | Cat# A10524, RRID:AB_2534033 | (1:1000)              |
| chemical compound, drug | tryptone                                           | VWR                      | 97063-386                    |                       |
| chemical compound, drug | 3-Iodo-L-tyrosine (3IY)                            | Sigma                    | I8250-5G                     |                       |
| software, algorithm     | SleepLab                                           | William Joiner           |                              | MATLAB-based software |
| software, algorithm     | FIJI                                               | FIJI                     |                              |                       |
| software, algorithm     | Prism 8                                            | GraphPad                 |                              |                       |
| other                   | USB webcam                                         | LOGITECH                 | Logitech Webcam Pro 9000     |                       |
| other                   | <i>Drosophila</i> Activity Monitoring (DAM) System | Trikinetics, Waltham, MA |                              |                       |

565 **Nutritional manipulations**

566 Unless otherwise stated, flies were raised on standard food (described in detail below) in a 12 h:12  
567 h light:dark (LD) cycle. Except where noted, 1- to 2-day-old flies in groups of 16 males and 16  
568 females were transferred to normal food (standard food for *Drosophila* maintenance), 5% w/v  
569 sucrose-2% w/v agar food (yeast deprivation), or 5% w/v sucrose-2% w/v agar food supplemented  
570 with 2.75% w/v yeast extract (Fisher Scientific, Waltham, MA), 2.75% w/v tryptone (VWR, Radnor,  
571 PA), or additional 2.75% sucrose. Flies were kept in these conditions for 6 days, with food renewed

572 every 3 days. Standard food was composed of 6.56% w/v cornmeal, 2.75% w/v yeast, 0.81% w/v  
573 agar, 6.48% v/v molasses, 0.93% v/v propionic acid and 0.25% v/v tegosept (anti-fungal agent,  
574 Genesee Scientific, El Cajon, CA). In MF pairs, males of varying nutritional conditions were paired  
575 with 3- to 4-day-old females kept under the normal food condition, except where noted.

576

### 577 **Sleep analysis**

578 Flies were raised and monitored at 25°C except where noted. For sleep analysis, 4- to 8-day-old  
579 flies entrained to a 12 h:12 h LD cycle were placed in glass tubes containing 5% sucrose and 2%  
580 agar, with the following exceptions: in the Normal Food → Normal Food and Yeast Deprivation →  
581 Normal Food conditions in Figure 2F-H, and in Normal Food conditions in Figure 4, flies were  
582 placed in tubes containing normal food. For experiments involving TrpA1, flies were raised in LD at  
583 22°C and monitored for ~1.5 days at 22°C to determine baseline levels, 1 day at 30°C to activate  
584 the TrpA1 channel, and 1 day at 22°C to examine recovery. Activity data were collected in 1-min  
585 bins using *Drosophila* Activity Monitoring (DAM) System (Trikinetics, Waltham, MA). Single-beam  
586 monitors were used except where noted. Beam breaks from single-beam monitors with infrared  
587 (IR) detectors at a single location or inter-beam movements from multi-beam monitors with IR  
588 detectors at 17 locations were used. Sleep was defined as a period of inactivity lasting at least 5  
589 min. For video recording, flies were loaded into 9 mm x 19 mm x 4 mm recording arenas containing  
590 5% sucrose and 2% agar. A USB webcam (Logitech Webcam Pro 9000) and infrared LEDs for  
591 nighttime recordings were used as previously described (Machado et al., 2017).

592 For DAM data, sleep parameters were analyzed using a MATLAB-based software,  
593 SleepLab (William Joiner). For video data, sleep and courtship (see below) of individual flies were  
594 manually scored for the first 5 min of each hour between ZT 18-24. We categorized behavior into  
595 three states: sleep, courting, wake but not courting (locomotion, eating, grooming, and brief  
596 inactivity). Sleep was defined as periods of no visible movement for at least 5 minutes. If a fly  
597 showed immobility for <5 min at the beginning or end of the 5-min analysis window, we examined

598 the behavior before or after the analysis window. If the inactive period belonged to a sleep episode  
599 ( $\geq 5$  min inactivity), we counted it toward sleep time. If not, we counted it toward wake but not  
500 courting time. Scoring was blinded to the experimental condition.

501

## 502 **Analysis of courtship and mating behavior**

503 For courtship assay, virgin iso31 male flies were collected, housed in groups of ~10 in standard  
504 food for 1-2 days, and transferred to either 5% sucrose food or standard food. Flies were kept in  
505 these conditions for 7 days, with food renewed every 3 days. Virgin iso31 females were kept on  
506 standard food for 4-5 days in groups of ~10. Courtship assays were performed between ZT1 and  
507 ZT4. A male and female were gently aspirated into a plastic mating chamber (15 mm diameter and  
508 3 mm depth) containing 5% sucrose and 2% agar and were kept separated until a divider was  
509 removed ~10 min later. Flies were recorded for 2 h using a USB webcam (Logitech Webcam Pro  
510 9000) and scored blind to experimental condition. Courtship index was determined as the fraction  
511 of total time a male was engaged in courtship activity during a 10-min period or until successful  
512 copulation after courtship initiation. Courtship activity included orienting, chasing, singing, and  
513 attempted copulation. For simultaneous analysis of courtship and sleep during the night, videos  
514 recorded under infrared light were manually scored for courtship and sleep during 5 min periods as  
515 described above.

516

## 517 **Immunohistochemistry**

518 For whole mount immunohistochemistry, fly brains were fixed in 4% paraformaldehyde (PFA) for  
519 30 min, dissected, and blocked in 5% normal goat serum for 1 h at RT. Primary and secondary  
520 antibodies were incubated at 4°C overnight. The following primary antibodies were used: rabbit  
521 anti-GFP (Molecular Probes, Eugene, OR, Cat# A-21312, RRID:AB\_221478) at 1:500; mouse anti-  
522 GFP (Thermo Fisher Scientific, Waltham, MA, RRID: AB\_221568) at 1:500; rabbit anti-RFP  
523 (Rockland Cat, Limerick, PA, # 600-401-379, RRID: AB\_2209751) at 1:500; and mouse anti-BRP

524 (DSHB, Iowa City, IA, Cat# nc82, RRID:AB\_2314866) at 1:150. The secondary antibodies, Alexa  
525 Fluor 488 goat anti-rabbit (Thermo Fisher Scientific, Waltham, MA, Cat# A11008,  
526 RRID:AB143165), Alexa Fluor 568 goat anti-rabbit (Thermo Fisher Scientific, Waltham, MA, Cat#  
527 A11011, RRID: AB\_143157), and Cy5 goat anti-mouse (Thermo Fisher Scientific, Waltham, MA,  
528 Cat# A10524, RRID:AB\_2534033) were used at 1:1000. Images were obtained on a Leica SP8  
529 confocal microscope.

530

### 531 **Calcium imaging**

532 4- to 7-day-old flies entrained to LD cycles were anesthetized on ice and dissected in adult  
533 hemolymph-like saline (AHL, 108 mM NaCl, 5 mM KCl, 2 mM CaCl<sub>2</sub>, 8.2 mM MgCl<sub>2</sub>, 4 mM  
534 NaHCO<sub>3</sub>, 1 mM NaH<sub>2</sub>PO<sub>4</sub>, 5 mM trehalose, 10 mM sucrose, 5 mM HEPES, pH 7.5, 265 mOsm;  
535 Wang et al., 2003). Dissected brains were mounted on a glass-bottom chamber containing AHL  
536 solution. A custom-built gravity-dependent perfusion system coupled to a flow valve (Warner  
537 Instruments, Hamden, CT) was used to control perfusion flow. Leica SP8 confocal microscope was  
538 used to acquire 8 slices (~2.5 μm/slice) of the protocerebral bridge region every 5 s for 5 min. 2.5  
539 mM ATP in AHL was delivered for 1 min after 1 min of baseline measurements. Average intensity  
540 projections were computed in FIJI, and the fluorescence intensity of the PB area was quantified.  
541 To correct for photobleaching of the fluorescence signal, frames acquired 30-60 s before the  
542 application of ATP and 150-180 s after the end of ATP perfusion were used to fit an exponential  
543 decay function. This fitted curve was then subtracted from the raw data, and the detrended data  
544 were used for subsequent analysis. The average intensity during the 30-s period prior to ATP  
545 perfusion was used as the baseline measurement,  $F^0$ . For each time point, normalized  $\Delta F$ ,  $(F -$   
546  $F^0)/F^0$ , was computed.

547

### 548 **Statistical analysis**

549 All analysis was performed using Prism 8 (GraphPad, San Diego, CA). To compare multiple  
550 groups, one-way ANOVAs were performed followed by Tukey or Dunnett T3 post-hoc tests  
551 depending on the type of pairwise comparisons. For experiments involving two factors, two-way  
552 ANOVAs were performed to test for the interaction, and a Sidak or Dunnett post-hoc test was  
553 employed to compare specific pairs of groups. Student's *t* test was used to compare pairs of  
554 groups. Brown-Forsythe and Welch's correction for unequal variances were employed when  
555 appropriate. Log-rank tests were used for cumulative courtship initiation and copulation success  
556 rates in mating assays. D'Agostino and Pearson tests were used to test for normality. Non-  
557 normally distributed data were analyzed by Mann-Whitney tests. All experiments were repeated on  
558 at least two separate occasions using flies from independent genetic crosses.

559 **References**

- 560 Alekseyenko O V, Chan Y-B, Li R, Kravitz EA. 2013. Single dopaminergic neurons that modulate  
561 aggression in *Drosophila*. *Proc Natl Acad Sci U S A* **110**:6151–6.  
562 doi:10.1073/pnas.1303446110
- 563 Anafi RC, Kayser MS, Raizen DM. 2019. Exploring phylogeny to find the function of sleep. *Nat Rev*  
564 *Neurosci* **20**:109–116. doi:10.1038/s41583-018-0098-9
- 565 Anagnostou C, Dorsch M, Rohlfs M. 2010. Influence of dietary yeasts on *Drosophila melanogaster*  
566 life-history traits. *Entomol Exp Appl* **136**:1–11. doi:10.1111/j.1570-7458.2010.00997.x
- 567 Artiushin G, Sehgal A. 2017. The *Drosophila* circuitry of sleep–wake regulation. *Curr Opin*  
568 *Neurobiol* **44**:243–250. doi:10.1016/J.CONB.2017.03.004
- 569 Becher PG, Flick G, Rozpędowska E, Schmidt A, Hagman A, Lebreton S, Larsson MC, Hansson  
570 BS, Piškur J, Witzgall P, Bengtsson M. 2012. Yeast, not fruit volatiles mediate *Drosophila*  
571 *melanogaster* attraction, oviposition and development. *Funct Ecol* **26**:822–828.  
572 doi:10.1111/j.1365-2435.2012.02006.x
- 573 Beckwith EJ, Geissmann Q, French AS, Gilestro GF. 2017. Regulation of sleep homeostasis by  
574 sexual arousal. *Elife* **6**. doi:10.7554/eLife.27445
- 575 Borbély AA. 1982. A two process model of sleep regulation. *Hum Neurobiol* **1**:195–204.
- 576 Brown EB, Shah KD, Faville R, Kottler B, Keene AC. 2020. *Drosophila* insulin-like peptide 2  
577 mediates dietary regulation of sleep intensity. *PLoS Genet* **16**:e1008270.  
578 doi:10.1371/journal.pgen.1008270
- 579 Burke CJ, Huetteroth W, Oswald D, Perisse E, Krashes MJ, Das G, Gohl D, Silies M, Certel S,  
580 Waddell S. 2012. Layered reward signalling through octopamine and dopamine in *Drosophila*.  
581 *Nature* **492**:433–437. doi:10.1038/nature11614



- 582 Chen D, Sitaraman D, Chen N, Jin X, Han C, Chen J, Sun M, Baker BS, Nitabach MN, Pan Y.  
583 2017. Genetic and neuronal mechanisms governing the sex-specific interaction between sleep  
584 and sexual behaviors in *Drosophila*. *Nat Commun* **8**:1–14. doi:10.1038/s41467-017-00087-5
- 585 Chen T-W, Wardill TJ, Sun Y, Pulver SR, Renninger SL, Baohan A, Schreiter ER, Kerr RA, Orger  
586 MB, Jayaraman V, Looger LL, Svoboda K, Kim DS. 2013. Ultrasensitive fluorescent proteins  
587 for imaging neuronal activity. *Nature* **499**:295–300. doi:10.1038/nature12354
- 588 Clyne JD, Miesenböck G. 2008. Sex-Specific Control and Tuning of the Pattern Generator for  
589 Courtship Song in *Drosophila*. *Cell* **133**:354–363. doi:10.1016/j.cell.2008.01.050
- 590 Dag U, Lei Z, Le JQ, Wong A, Bushey D, Keleman K. 2019. Neuronal reactivation during post-  
591 learning sleep consolidates long-term memory in *drosophila*. *Elife* **8**. doi:10.7554/eLife.42786
- 592 Donlea JM, Pimentel D, Miesenböck G. 2014. Neuronal machinery of sleep homeostasis in  
593 *Drosophila*. *Neuron* **81**:860–872. doi:10.1016/j.neuron.2013.12.013
- 594 Donlea JM, Thimman MS, Suzuki Y, Gottschalk L, Shaw PJ. 2011. Inducing sleep by remote  
595 control facilitates memory consolidation in *Drosophila*. *Science (80- )* **332**:1571–1576.  
596 doi:10.1126/science.1202249
- 597 Ellendersen BE, von Philipsborn AC. 2017. Neuronal modulation of *D. melanogaster* sexual  
598 behaviour. *Curr Opin insect Sci* **24**:21–28. doi:10.1016/j.cois.2017.08.005
- 599 Fricke C, Bretman A, Chapman T. 2008. Adult male nutrition and reproductive success in  
700 *Drosophila melanogaster*. *Evolution (N Y)* **62**:3170–3177. doi:10.1111/j.1558-  
701 5646.2008.00515.x
- 702 Garbe DS, Bollinger WL, Vigderman A, Masek P, Gertowski J, Sehgal A, Keene AC. 2015.  
703 Context-specific comparison of sleep acquisition systems in *Drosophila*. *Biol Open* **4**:1558–  
704 1568. doi:10.1242/bio.013011

- 705 Garbe DS, Vigderman AS, Moscato E, Dove AE, Vecsey CG, Kayser MS, Sehgal A. 2016.  
706 Changes in Female *Drosophila* Sleep following Mating Are Mediated by SPSN-SAG Neurons.  
707 *J Biol Rhythms* **31**:551–567. doi:10.1177/0748730416668048
- 708 Goertz RB, Wanat MJ, Gomez JA, Brown ZJ, Phillips PEM, Paladini CA. 2015. Cocaine Increases  
709 Dopaminergic Neuron and Motor Activity via Midbrain  $\alpha 1$  Adrenergic Signaling.  
710 *Neuropsychopharmacology* **40**:1151–1162. doi:10.1038/npp.2014.296
- 711 Goetting DL, Soto R, Van Buskirk C. 2018. Food-Dependent Plasticity in *Caenorhabditis elegans*  
712 Stress-Induced Sleep Is Mediated by TOR-FOXA and TGF- $\beta$  Signaling. *Genetics* **209**:1183–  
713 1195. doi:10.1534/genetics.118.301204
- 714 Griffith LC. 2013. Neuromodulatory control of sleep in *Drosophila melanogaster*: Integration of  
715 competing and complementary behaviors. *Curr Opin Neurobiol*.  
716 doi:10.1016/j.conb.2013.05.003
- 717 Hamada FN, Rosenzweig M, Kang K, Pulver SR, Ghezzi A, Jegla TJ, Garrity PA. 2008. An internal  
718 thermal sensor controlling temperature preference in *Drosophila*. *Nature* **454**:217–220.  
719 doi:10.1038/nature07001
- 720 Hanesch U, Fischbach KF, Heisenberg M. 1989. Neuronal architecture of the central complex in  
721 *Drosophila melanogaster*. *Cell Tissue Res* **257**:343–366. doi:10.1007/BF00261838
- 722 Inagaki HK, Jung Y, Hoopfer ED, Wong AM, Mishra N, Lin JY, Tsien RY, Anderson DJ. 2014.  
723 Optogenetic control of *Drosophila* using a red-shifted channelrhodopsin reveals experience-  
724 dependent influences on courtship. *Nat Methods* **11**:325–332. doi:10.1038/nmeth.2765
- 725 Isaac RE, Li C, Leedale AE, Shirras AD. 2010. *Drosophila* male sex peptide inhibits siesta sleep  
726 and promotes locomotor activity in the post-mated female. *Proc R Soc B Biol Sci* **277**:65–70.  
727 doi:10.1098/rspb.2009.1236

- 728 Jacobs BL, McGinty DJ. 1971. Effects of food deprivation on sleep and wakefulness in the rat. *Exp*  
729 *Neurol* **30**:212–222. doi:10.1016/S0014-4886(71)80002-X
- 730 Jaggard J, Robinson BG, Stahl BA, Oh I, Masek P, Yoshizawa M, Keene AC. 2017. The lateral line  
731 confers evolutionarily derived sleep loss in the Mexican cavefish. *J Exp Biol* **220**:284–293.  
732 doi:10.1242/jeb.145128
- 733 Joiner WJ. 2016. Unraveling the Evolutionary Determinants of Sleep. *Curr Biol*.  
734 doi:10.1016/j.cub.2016.08.068
- 735 Keene AC, Duboué ER, McDonald DM, Dus M, Suh GSB, Waddell S, Blau J. 2010. Clock and  
736 cycle limit starvation-induced sleep loss in drosophila. *Curr Biol* **20**:1209–1215.  
737 doi:10.1016/j.cub.2010.05.029
- 738 Ki Y, Lim C. 2019. Sleep-promoting effects of threonine link amino acid metabolism in Drosophila  
739 neuron to GABAergic control of sleep drive. *Elife* **8**. doi:10.7554/eLife.40593
- 740 Kimura K, Hachiya T, Koganezawa M, Tazawa T, Yamamoto D. 2008. Fruitless and Doublesex  
741 Coordinate to Generate Male-Specific Neurons that Can Initiate Courtship. *Neuron* **59**:759–  
742 769. doi:10.1016/j.neuron.2008.06.007
- 743 Kohatsu S, Koganezawa M, Yamamoto D. 2011. Female Contact Activates Male-Specific  
744 Interneurons that Trigger Stereotypic Courtship Behavior in Drosophila. *Neuron* **69**:498–508.  
745 doi:10.1016/j.neuron.2010.12.017
- 746 Lesku JA, Rattenborg NC, Valcu M, Vyssotski AL, Kuhn S, Kuemmeth F, Heidrich W, Kempnaers  
747 B. 2012. Adaptive sleep loss in polygynous pectoral sandpipers. *Science* **337**:1654–8.  
748 doi:10.1126/science.1220939
- 749 Lima SQ, Miesenböck G. 2005. Remote control of behavior through genetically targeted  
750 photostimulation of neurons. *Cell* **121**:141–152. doi:10.1016/j.cell.2005.02.004

- 751 Lin CY, Chuang CC, Hua TE, Chen CC, Dickson BJ, Greenspan RJ, Chiang AS. 2013. A  
752 Comprehensive Wiring Diagram of the Protocerebral Bridge for Visual Information Processing  
753 in the *Drosophila* Brain. *Cell Rep* **3**:1739–1753. doi:10.1016/j.celrep.2013.04.022
- 754 Lin W-S, Yeh S-R, Fan S-Z, Chen L-Y, Yen J-H, Fu T-F, Wu M-S, Wang P-Y. 2018. Insulin  
755 signaling in female *Drosophila* links diet and sexual attractiveness. *FASEB J* **32**:3870–3877.  
756 doi:10.1096/fj.201800067R
- 757 Liu C, Meng Z, Wiggin TD, Yu J, Reed ML, Guo F, Zhang Y, Rosbash M, Griffith LC. 2019. A  
758 Serotonin-Modulated Circuit Controls Sleep Architecture to Regulate Cognitive Function  
759 Independent of Total Sleep in *Drosophila*. *Curr Biol* **29**:3635-3646.e5.  
760 doi:10.1016/j.cub.2019.08.079
- 761 Liu Q, Liu S, Kodama L, Driscoll MR, Wu MN. 2012. Two dopaminergic neurons signal to the  
762 dorsal fan-shaped body to promote wakefulness in *Drosophila*. *Curr Biol* **22**:2114–2123.  
763 doi:10.1016/j.cub.2012.09.008
- 764 Liu S, Liu Q, Tabuchi M, Correspondence MNW, Wu MN. 2016. Sleep Drive Is Encoded by Neural  
765 Plastic Changes in a Dedicated Circuit Article Sleep Drive Is Encoded by Neural Plastic  
766 Changes in a Dedicated Circuit. *Cell* **165**:1347–1360. doi:10.1016/j.cell.2016.04.013
- 767 Liu Q, Tabuchi M, Liu S, Kodama L, Horiuchi W, Daniels J, Chiu L, Baldoni D, Wu MN. 2017.  
768 Branch-specific plasticity of a bifunctional dopamine circuit encodes protein hunger. *Science*  
769 **356**:534–539. doi:10.1126/science.aal3245
- 770 Machado DR, Afonso DJ, Kenny AR, Öztürk-Çolak A, Moscato EH, Mainwaring B, Kayser M, Koh  
771 K. 2017. Identification of octopaminergic neurons that modulate sleep suppression by male  
772 sex drive. *Elife* **6**. doi:10.7554/eLife.23130
- 773 Manoli DS, Foss M, Villella A, Taylor BJ, Hall JC, Baker BS. 2005. Male-specific fruitless specifies

- 774 the neural substrates of *Drosophila* courtship behaviour. *Nature* **436**:395–400.  
775 doi:10.1038/nature03859
- 776 Murphy KR, Deshpande SA, Yurgel ME, Quinn JP, Weissbach JL, Keene AC, Dawson-Scully K,  
777 Huber R, Tomchik SM, Ja WW. 2016. Postprandial sleep mechanics in *Drosophila*. *Elife* **5**.  
778 doi:10.7554/eLife.19334
- 779 Nall A, Sehgal A. 2014. Monoamines and sleep in *Drosophila*. *Behav Neurosci* **128**:264–272.  
780 doi:10.1037/a0036209
- 781 Nässel DR, Elekes K. 1992. Aminergic neurons in the brain of blowflies and *Drosophila*: dopamine-  
782 and tyrosine hydroxylase-immunoreactive neurons and their relationship with putative  
783 histaminergic neurons. *Cell Tissue Res* **267**:147–67. doi:10.1007/bf00318701
- 784 Ni JD, Gurav AS, Liu W, Ogunmowo TH, Hackbart H, Elsheikh A, Verdegaal AA, Montell C. 2019.  
785 Differential regulation of the *drosophila* sleep homeostat by circadian and arousal inputs. *Elife*  
786 **8**. doi:10.7554/eLife.40487
- 787 Nicolaï LJJ, Ramaekers A, Raemaekers T, Drozdzecki A, Mauss AS, Yan J, Landgraf M, Annaert  
788 W, Hassan BA. 2010. Genetically encoded dendritic marker sheds light on neuronal  
789 connectivity in *Drosophila*. *Proc Natl Acad Sci U S A* **107**:20553–20558.  
790 doi:10.1073/pnas.1010198107
- 791 Pan Y, Meissner GW, Baker BS. 2012. Joint control of *Drosophila* male courtship behavior by  
792 motion cues and activation of male-specific P1 neurons. *Proc Natl Acad Sci U S A*  
793 **109**:10065–10070. doi:10.1073/pnas.1207107109
- 794 Pimentel D, Donlea JM, Talbot CB, Song SM, Thurston AJF, Miesenböck G. 2016. Operation of a  
795 homeostatic sleep switch. *Nature* **536**:333–337. doi:10.1038/nature19055
- 796 Rattenborg NC, Mandt BH, Obermeyer WH, Winsauer PJ, Huber R, Wikelski M, Benca RM. 2004.

- 797        Migratory sleeplessness in the white-crowned sparrow (*Zonotrichia leucophrys gambelii*).  
798        *PLoS Biol* **2**:E212. doi:10.1371/journal.pbio.0020212
- 799        Rattenborg NC, Voirin B, Cruz SM, Tisdale R, Dell’Omo G, Lipp H-P, Wikelski M, Vyssotski AL.  
300        2016. Evidence that birds sleep in mid-flight. *Nat Commun* **7**:12468.  
301        doi:10.1038/ncomms12468
- 302        Ribeiro C, Dickson BJ. 2010. Sex Peptide Receptor and Neuronal TOR/S6K Signaling Modulate  
303        Nutrient Balancing in *Drosophila*. *Curr Biol* **20**:1000–1005. doi:10.1016/J.CUB.2010.03.061
- 304        Robertson FW. 1960. The ecological genetics of growth in *Drosophila* 1. Body size and  
305        developmental time on different diets 1. Body size and developmental time on different diets.  
306        *Genet Res, Camb* **1**:288–304. doi:10.1017/S0016672300000264
- 307        Robinson IM, Ranjan R, Schwarz TL. 2002. Synaptotagmins I and IV promote transmitter release  
308        independently of Ca<sup>2+</sup> binding in the C2A domain. *Nature* **418**:336–340.  
309        doi:10.1038/nature00915
- 310        Singh C, Oikonomou G, Prober DA. 2015. Norepinephrine is required to promote wakefulness and  
311        for hypocretin-induced arousal in zebrafish. *Elife* **4**. doi:10.7554/eLife.07000.001
- 312        Stockinger P, Kvitsiani D, Rotkopf S, Tirián L, Dickson BJ. 2005. Neural circuitry that governs  
313        *Drosophila* male courtship behavior. *Cell* **121**:795–807. doi:10.1016/j.cell.2005.04.026
- 314        Talay M, Richman EB, Snell NJ, Hartmann GG, Fisher JD, Sorkaç A, Santoyo JF, Chou-Freed C,  
315        Nair N, Johnson M, Szymanski JR, Barnea G. 2017. Transsynaptic mapping of second-order  
316        taste neurons in flies by trans-Tango. *Neuron* **96**:783-795.e4.  
317        doi:10.1016/j.neuron.2017.10.011
- 318        Tomita J, Kume K. 2017. Genes and neural circuits for sleep of the fruit fly. *Neurosci Res* **118**:82–  
319        91. doi:10.1016/j.neures.2017.04.010

- 320 Ueno T, Tomita J, Tanimoto H, Endo K, Ito K, Kume S, Kume K. 2012. Identification of a dopamine  
321 pathway that regulates sleep and arousal in *Drosophila*. *Nat Neurosci* **15**:1516–1523.  
322 doi:10.1038/nn.3238
- 323 von Philipsborn AC, Liu T, Yu JY, Masser C, Bidaye SS, Dickson BJ. 2011. Neuronal Control of  
324 *Drosophila* Courtship Song. *Neuron* **69**:509–522. doi:10.1016/j.neuron.2011.01.011
- 325 Wang JW, Wong AM, Flores J, Vosshall LB, Axel R. 2003. Two-photon calcium imaging reveals an  
326 odor-evoked map of activity in the fly brain. *Cell* **112**:271–282. doi:10.1016/S0092-  
327 8674(03)00004-7
- 328 Wang QP, Lin YQ, Zhang L, Wilson YA, Oyston LJ, Cotterell J, Qi Y, Khuong TM, Bakhshi N,  
329 Planchenault Y, Browman DT, Lau MT, Cole TA, Wong ACN, Simpson SJ, Cole AR,  
330 Penninger JM, Herzog H, Neely GG. 2016. Sucralose Promotes Food Intake through NPY and  
331 a Neuronal Fasting Response. *Cell Metab* **24**:75–90. doi:10.1016/j.cmet.2016.06.010
- 332 Wolff T, Iyer NA, Rubin GM. 2015. Neuroarchitecture and neuroanatomy of the *Drosophila* central  
333 complex: A GAL4-based dissection of protocerebral bridge neurons and circuits. *J Comp*  
334 *Neurol* **523**:997–1037. doi:10.1002/cne.23705
- 335 Wolff T, Rubin GM. 2018. Neuroarchitecture of the *Drosophila* central complex: A catalog of  
336 nodulus and asymmetrical body neurons and a revision of the protocerebral bridge catalog. *J*  
337 *Comp Neurol* **526**:2585–2611. doi:10.1002/cne.24512
- 338 Yang Z, Huang R, Fu X, Wang G, Qi W, Mao D, Shi Z, Shen WL, Wang L. 2018. A post-ingestive  
339 amino acid sensor promotes food consumption in *Drosophila*. *Cell Res* **28**:1013–1025.  
340 doi:10.1038/s41422-018-0084-9
- 341 Young JM, Armstrong JD. 2010. Structure of the adult central complex in *Drosophila* : Organization  
342 of distinct neuronal subsets. *J Comp Neurol* **518**:1500–1524. doi:10.1002/cne.22284



- 343 Yurgel ME, Kakad P, Zandawala M, Nässel DR, Godenschwege TA, Keene AC. 2019. A single  
344 pair of leucokinin neurons are modulated by feeding state and regulate sleep–metabolism  
345 interactions. *PLOS Biol* **17**:e2006409. doi:10.1371/journal.pbio.2006409
- 346 Zajitschek F, Zajitschek SRK, Friberg U, Maklakov AA. 2013. Interactive effects of sex, social  
347 environment, dietary restriction, and methionine on survival and reproduction in fruit flies. *Age*  
348 (*Omaha*) **35**:1193–1204. doi:10.1007/s11357-012-9445-3
- 349 Zhang YQ, Rodesch CK, Broadie K. 2002. Living synaptic vesicle marker: synaptotagmin-GFP.  
350 *Genesis* **34**:142–5. doi:10.1002/gene.10144

351 **Video legends**

352 **Video 1. Male-Female pairs at ZT 20 under infrared light.**

353 Normally fed or yeast-deprived iso31 males were paired with normally fed female partners. While

354 most normally fed males were courting, the majority of yeast-deprived males were inactive.
